1       **Different RNA profiles in plasma derived small and large extracellular**  
2                   **vesicles of Neurodegenerative diseases patients.**

3       Daisy Sproviero<sup>1</sup>†, Stella Gagliardi<sup>1</sup>†, Susanna Zucca<sup>1</sup>, Maddalena Arigoni<sup>2</sup>, Marta  
4       Giannini<sup>1,3</sup>, Maria Garofalo<sup>1,4</sup>, Martina Olivero<sup>5</sup>, Michela Dell’Orco<sup>6</sup>, Orietta Pansarasa<sup>1</sup>,  
5       Stefano Bernuzzi<sup>7</sup>, Micol Avenali<sup>8</sup>, Matteo Cotta Ramusino<sup>9</sup>, Luca Diamanti<sup>9</sup>, Brigida  
6       Minafra<sup>9</sup>, Giulia Perini<sup>9</sup>, Roberta Zangaglia<sup>9</sup>, Alfredo Costa<sup>9</sup>, Mauro Ceroni<sup>9</sup>, Nora I.  
7       Perrone-Bizzozero<sup>10</sup>, Raffaele A. Calogero<sup>2</sup>, Cristina Cereda<sup>1\*</sup>.

8       \*Correspondence: Cristina Cereda, [cristina.cereda@mondino.it](mailto:cristina.cereda@mondino.it), +39-0382380348

9       †Authors have equally contributed to this work.

10       **Abstract.**

11       **Background.** Identifying robust biomarkers is essential for early diagnosis of  
12       neurodegenerative diseases (NDs). Large (LEVs) and small extracellular vesicles (SEVs)  
13       are extracellular vesicles (EVs) of different sizes and biological functions transported in  
14       blood and they may be valid biomarkers for NDs. The aim of our study was to investigate  
15       common and different mRNA/miRNA signatures in plasma derived LEVs and SEVs of  
16       Alzheimer’s Disease (AD), Parkinson’s disease (PD), Amyotrophic Lateral Sclerosis (ALS)  
17       and Fronto-Temporal Dementia (FTD) patients.

18       **Methods.** LEVs and SEVs were isolated from plasma of patients and healthy volunteers  
19       (CTR) by filtration and ultracentrifugation and RNA was extracted. Whole transcriptome  
20       and miRNA libraries were carried out by Next Generation Sequencing (NGS).

21       **Results.** We detected different deregulated RNAs in LEVs and SEVs from patients with the  
22       same disease. MiRNAs resulted to be the most interesting subpopulation of transcripts  
23       transported by plasma derived SEVs since they appeared to discriminate all NDs disease  
24       from CTRs and they can provide a signature for each NDs. Common enriched pathways for  
25       SEVs were mainly linked to ubiquitin mediated proteolysis and Toll-like receptor signaling  
26       pathways and for LEVs to neurotrophin signaling and Glycosphingolipid biosynthesis  
27       pathway.

28 **Conclusion.** LEVs and SEVs are involved in different pathways and this might give a  
29 specificity to their role in the spreading/protection of the disease. The study of common and  
30 different RNAs transported by LEVs and SEVs can be of great interest for biomarker  
31 discovery and for pathogenesis studies in neurodegeneration.

32 **Keywords:** Alzheimer's Disease, Parkinson's Disease, Amyotrophic Lateral Sclerosis,  
33 Frontotemporal Dementia, Large Extracellular Vesicles, Small Extracellular Vesicles,  
34 RNA-seq, RNAs, miRNAs

35

---

## 36 **Background**

37 Neurodegenerative disorders are a group of diseases characterized by loss of neurons within  
38 the brain and/or spinal cord [1]. They include both common neurodegenerative disorders  
39 such as Alzheimer's disease (AD), Parkinson's disease (PD), and rare diseases as  
40 Amyotrophic Lateral Sclerosis (ALS) and Fronto-Temporal Dementia (FTD) [2]. Each of  
41 these disorders are characterized by specific features, both clinical and pathological  
42 involving characteristic central nervous regions [3].

43 Genetics are also known to play an essential role in neurodegenerative diseases (NDs).  
44 Genome-wide association studies (GWAS) identified many causative mutations and single  
45 nucleotide polymorphisms (SNPs) in genes associated with the etiology or risk factors of  
46 NDs. However, only few cases of NDs can be explained by a typical Mendelian inheritance  
47 and more than 90% of cases, defined as "sporadic" forms, are regulated by other pathways  
48 [4].

49 Neurodegenerative diseases have in common protein aggregates such as pathological  
50 hallmark lesions. Amyloid  $\beta$ -protein, Tau-protein,  $\alpha$ -synuclein, TDP-43 and SOD1 are the  
51 most frequently aggregated proteins [5]. AD is characterized by the extracellular  
52 accumulation of beta amyloid ( $A\beta$ ) peptide detectable as  $A\beta$  plaques in patients' brain. Also  
53 intracellular Tau protein aggregation is found in AD brain [6]. The main PD features are  
54 degeneration of the dopaminergic pigmented neurons in the substantia nigra (SN) and  
55 accumulation of  $\alpha$ -synuclein protein, which is the main component of Lewy bodies (LBs)  
56 [7]. ALS is a disease characterized by motor neurons death and one of the main pathological  
57 hallmarks is given by specific alterations of SOD1 [8,9,10], and aggregation of TDP-43 [11].  
58 In FTD, there is a deregulation of RNA-binding proteins (RBPs) and aggregation of proteins  
59 in the frontal and temporal lobes with microvacuolation, neuronal loss and astrocytic gliosis  
60 [12]. TDP-43 and Tau aggregates are hallmarks of FTD [13]. Although these proteins  
61 constitute disease-characteristic aggregates, they are not restricted to these clinical  
62 presentations [5]. For example, TDP-43 pathology is also found in over 50% of cases of AD  
63 patients, while Fronto-Temporal Lobar Degeneration (FTLD) can be subclassified in  
64 disorders that accumulate  $\tau$ , i.e., FTLD-tau; TDP-43, i.e., FTLD-TDP, and other FTLD-forms  
65 that accumulate other proteins (e.g., fused in sarcoma (FUS) [14]. FTLD-TDP and ALS share  
66 neuronal TDP-43 aggregates and a certain number of ALS cases also develop FTLD-TDP  
67 [11,15]. In NDs, the abnormal protein accumulation triggers the activation of common  
68 biological and molecular features, inflammatory and oxidative-stress pathways and  
69 mitochondrial dysfunction [16,17,18,19,20].

70 Although the role of protein aggregates received much emphasis in NDs, the aberrant RNA  
71 metabolism processing converges as a common factor in the pathogenesis of these diseases  
72 [21,22]. Abnormal RNA metabolism is associated with disease-specific alterations in RNA-  
73 binding proteins (RBPs), and in non-coding RNAs, such as microRNAs (miRNA), transfer  
74 RNAs (tRNA) and long-noncoding RNAs (lncRNA) [23].

75 Several common and specific mechanisms of NDs are described in the literature, however no  
76 biomarkers are available to identify the onset, progression and comorbidity of those diseases.  
77 Brain cells release extracellular vesicles (EVs), which can pass brain barrier [24,25] and  
78 blood derived EVs can be used also to monitor disease processes occurring in the brain  
79 [26,27,28]. EVs, spherical vesicles heterogeneous in size (30 nm-1  $\mu$ m in diameter) are  
80 transporters of receptors, bioactive lipids, proteins, and nucleic acids, such as mRNAs,  
81 lncRNAs and miRNAs [24,25,26,27]. EVs are classified as: exosomes (EXOs),  
82 microvesicles (MVs), and apoptotic bodies [29,30]. EXOs are secreted membrane vesicles  
83 (approximately 30–150 nm in diameter) formed intracellularly and released from exocytosis  
84 of multivesicular bodies, whereas apoptotic bodies (approximately 1000–4000 nm in  
85 diameter) are released by dying cells. MVs (approximately 100–1000 nm in diameter) are  
86 shed from cells by outward protrusion (or budding) of a plasma membrane followed by  
87 fission of their membrane stalk [29,30]. However, the guidelines of the International Society  
88 for the study of Extracellular Vesicle (ISEV) released in 2018, declare that MVs and EXOs  
89 cannot be distinguished on a particular biogenesis pathway and so they can be distinguished  
90 in small extracellular vesicles (SEVs) (30-130 nm) and large extracellular vesicles (LEVs)

91 (130-1000 nm) mainly on their size [31].

92 Several studies on the role of extracellular vesicles in NDs are available in the literature.

93 Some studies have examined miRNAs and RNAs in EVs isolated from cultured cell media

94 from the Central Nervous System (CNS) cells (e.g., neurons, astrocytes, microglia, and

95 oligodendrocytes) and few have examined miRNAs in EVs in plasma of AD, PD and ALS

96 [32, 33, 34]. However, none of these studies considered the differences between SEVs from

97 LEVs. We previously described in ALS that SEVs and LEVs in plasma are different in

98 dimensions and for loading of some pathological proteins for ALS (SOD1, TDP-43, p-TDP-

99 43, and FUS) and lipids [35,55]. In this paper, we have investigated the RNA cargo of EVs

100 derived from plasma of patients affected by four neurodegenerative diseases (AD, PD, ALS

101 and FTD). The aim was to identify common and specific transcripts and small RNAs s

102 between the two subpopulation of EVs in the same disease and in the four diseases in order

103 to identify new biomarkers.

## 104 **Methods**

105 **Study Subjects.** Participants were recruited at the IRCCS Mondino Foundation, Pavia

106 (Italy). Subjects participating in the study signed, before being enrolled, an informed consent

107 form approved by the Ethical Committee (for ALS patients Protocol n°-20180034329; for

108 PD patients Protocol n°20170001758; for AD patients Protocol n°20170016071; for FTD

109 patients Protocol n°20180049077). Plasma isolated from 6 AD, 9 PD, 6 sporadic ALS

110 (SALS), 9 FTD patients were used (Table 1). All patients were screened for mutations using

111 a customized panel of 176 genes associated to neurodegenerative and neuromuscular diseases

112 by Next Generation Sequencing (Sure Select QXT Target Enrichment, Agilent Technology).

113 ALS and FTD patients were screened for C9orf72 using the FastStart Taq DNA Polymerase  
114 Kit (Roche).

115 Diagnosis of AD was based on criteria expressed by Aging-Alzheimer's Association  
116 workgroups [36]. For PD and FTD patients Movement Disorder Society (MDS) clinical  
117 diagnostic criteria were used [37, 38]. ALS diagnosis was made according to the revised El  
118 Escorial Criteria [39].

119 Six age-matched healthy volunteers free from any pharmacological treatment were recruited at  
120 the Immunohematological and Transfusional Service IRCCS Foundation "San Matteo", Pavia  
121 (Italy) and used as healthy controls (CTRs). All the subjects were assayed to rule out the  
122 presence of inflammatory diseases by white blood cell counts and subjects with WBCs  
123  $>11 \times 10^9$  were excluded from the study. Patients' characteristics are reported in Table 2.

124 **LEVs and SEVs isolation.** Venous blood (15 ml) was collected in sodium citrate tubes from  
125 all patients and controls and processed as previously described [35,40]. Briefly, platelet-free  
126 plasma was centrifuged at 20,000xg for 1 hour. The pellet was washed in 0.2  $\mu$ m filter filtered  
127 1X PBS (Sigma-Aldrich, Italy). The supernatant of LEVs was filtered through a 0.2  $\mu$ m filter  
128 and spun in an Optima MAX-TL Ultracentrifuge at 100,000xg for 1 hour at 4°C and SEVs  
129 pellet was washed with 1 ml of filtered 1X PBS. Western Blot analysis for LEVs markers  
130 (Annexin V-Abcam, Inc., United States) and for SEVs markers (Alix-Abcam, Inc., United  
131 States), Transmission Electron Microscopy (TEM) and Nanoparticle-tracking analysis (NTA)  
132 were run to confirm LEVs and SEVs purity as we previously described [35,40].

133 **RNA extraction.** RNA was extracted from LEVs and SEVs fractions using Qiagen miRNeasy  
134 Mini kit (Qiagen, Germany) according to the manufacturer's instructions.

135 **RNA libraries preparations.** Small RNA libraries were constructed from the RNA samples  
136 using NEBNext® kit (New England Biolabs, USA). Individually-barcoded libraries were  
137 mixed. Pools were size selected on Novex 10% TBE gels (Life Technologies, USA) to enrich  
138 for miRNAs fraction. Sequencing (75 nts single-end) was performed on Illumina NextSeq500  
139 (Illumina, USA).

140 Long RNA libraries (mRNAs and lncRNAs) were prepared with the Illumina TruSeq Stranded  
141 RNA Library Prep (Illumina, USA). Sequencing (75 nts paired-end) was performed on  
142 Illumina NextSeq500 (Illumina, USA). Demultiplexing was done as described for miRNA  
143 sequences.

144 **Bioinformatic data analysis.** The raw bcl files were converted into demultiplexed fastq files  
145 with bcl2fastq (Illumina, USA) implemented in docker4seq package [41]. For the row count  
146 analysis, only transcripts with counts above five were considered. No relevant difference  
147 between count in SEVs and LEVs in four diseases emerged.

148 Quantification of miRNAs was done as described in the literature [42]. The workflow,  
149 including quality control filter, trimming of adapters, reads mapping against miRNA  
150 precursors, is implemented in docker4seq package [42]. Differential expression analysis was  
151 performed with the R package DESeq2, implemented in docker4seq package. We imposed a  
152 minimum  $|\text{Log}_2\text{FC}|$  of 1 and a FDR lower than 0.1 as thresholds to detect differentially  
153 expressed miRNAs.

154 Quantification of genes and isoforms was performed as previously described [43,44].

155 Differential expression analysis for mRNAs was performed using R package EBSeq [45], using

156 same threshold indicated above for miRNAs differential expression analysis. In order to  
157 understand common miRNAs of the four diseases, we calculated the intersection of deregulated  
158 miRNAs compared to CTRs with <http://bioinformatics.psb.ugent.be/webtools/Venn/>.

159 The datasets generated and analysed during the current study are available in the NCBI GEO  
160 repository [GSE155700].

161 **Pathways analysis.** Gene enrichment analysis was performed on coding genes with KEGG  
162 pathway analysis (Kyoto Encyclopedia of Genes and Genomes,  
163 <http://www.genome.ad.jp/kegg>) and enrichR web tool [46,47]. miRNA-targets analysis was  
164 done with miRWalk web tool (<http://mirwalk.umm.uni-heidelberg.de>).

165 In addition, Ingenuity pathway analysis (IPA, v. 2019 summer release, Qiagen, Germany) was  
166 performed to identify mRNAs and biological networks associated with the differentially  
167 expressed circulating miRNAs in SEVs and LEVs in each of the neurodegenerative disorders.

## 168 **Results**

### 169 **miRNAs selectively traffic into SEVs and LEVs**

170 We previously demonstrated significant differences between LEVs and SEVs derived from  
171 plasma for dimension, markers, protein loading (see figure S1a, b, c, d) [35,40,55]. Cellular  
172 miRNAs and RNAs can selectively traffick into LEVs and SEVs, so we first identified  
173 differentially expressed miRNAs (DE miRNAs) and mRNAs (DE mRNA) in SEVs and  
174 LEVs among the four groups of patients (AD, PD, ALS, FTD) and the healthy controls  
175 (CTRs) (Table 3, Table 4, Table S1, Table S2). We then moved to investigate the number of  
176 different and common deregulated miRNAs and RNAs that sort into SEVs and LEVs in the



177 same disease. In AD, of the 33 miRNAs found in SEVs and 13 in LEVs, 6 distribute to both  
178 (Figure 1a), 4 upregulated and 2 downregulated. In the case of FTD, of the 88 miRNAs in  
179 SEVs and 130 in LEVs, 34 were in common, 32 upregulated and 2 downregulated (Figure 1b).  
180 Concerning miRNAs in ALS, of the 109 miRNAs in SEVs and 197 in LEVs, 67 were in  
181 common, (Figure 1c), 45 upregulated and 22 downregulated. In PD, of the 104 miRNAs found  
182 in SEVs and 109 in LEVs, 34 distribute to both (Figure 1d), 30 upregulated and 4  
183 downregulated. For mRNA, we could only calculate the intersection between SEVs and LEVs  
184 for ALS and FTD, since there were no deregulated mRNAs (with a  $|\text{Log}_2\text{FC}|$  of 1) in EVs from  
185 AD patients and in SEVs of PD patients compared to CTRs. For FTD, of the 228 mRNA in  
186 SEVs and 114 in LEVs, 39 were in common, 36 upregulated and 3 downregulated (Figure 2a).  
187 For ALS, of the 522 mRNA in SEVs and 124 in LEVs, 44 were in common (33 upregulated  
188 and 11 downregulated) (Figure 2b). The percentage of common miRNAs and RNAs between  
189 SEVs and LEVs are shown in Table 5.

190

### 191 **miRNAs expression profiles and common pathways in SEVs and LEVs of NDs.**

192 miRNAs detected as differentially expressed in SEVs at least one disease were pooled together  
193 and analyzed by principal component analysis (PCA) (Figure 3a). The same approach was  
194 applied to LEVs.

195 As shown in Figure 3a, miRNAs contained in SEVs of the four NDs did not overlap with the  
196 CTRs (orange). Interestingly, clusters related to ALS (light green) and AD (dark green) patients  
197 could be identified in separate components, while (violet) overlapped with some ALS

198 specimens. The miRNA cargo of SEVs were well differentiated in all four diseases;  
199 interestingly, we identified a well-defined group of specific miRNAs in SEVs from ALS,  
200 suggesting a possible signature for the disease (Figure 3a, Figure 4a).

201 The PCA as well as the heatmap of the differential expressed miRNAs detected in LEVs did  
202 not provide a clear separation of the four diseases (Figure 3b, Figure 4b).

203 However, miRNAs in LEVs of ALS patients could be distinguished from CTRs and from the  
204 other three diseases, with some overlap with FTD.

205 In order to detect common miRNAs of the four diseases, we calculated the intersection of  
206 deregulated miRNAs compared to CTRs. We observed that 6 miRNAs were in common among  
207 the four diseases in SEVs (hsa-miR-133a-3, hsa-miR-543, hsa-miR-4451, hsa-miR-6889-5p,  
208 hsa-miR-4781-3p, hsa-miR-323b-3p) (Figure 5a) and 7 miRNAs (hsa-miR-1262, hsa-miR-  
209 3152-3p, hsa-miR-7856-5p, hsa-miR-365a-5p, hsa-miR-4433b-5p, hsa-miR-6068, hsa-miR-  
210 767-3p) in LEVs (Figure 5b). Enriched pathways found with MiRWalk included Ubiquitin  
211 mediated proteolysis, MAPK signaling pathway, Toll-like receptor signaling pathways for  
212 SEVs and Neurotrophin signaling pathway, MAPK signaling pathway, Glycosphingolipid  
213 biosynthesis, Ras signaling pathway for LEVs (Figure 5a and 5b).

214

## 215 **Coding and lncRNAs expression profiles and common pathways in SEVs and in LEVs of** 216 **NDs**

217 We analyzed differentially expressed mRNAs and lncRNAs in SEVs and LEVs of the four  
218 groups (Table 4, Table S2). As for miRNAs, mRNAs in SEVs showed that ALS patients are

219 well divided from CTRs and from the other NDs except from FTD (Figure 6a), showing again  
220 a partial overlapping between ALS and FTD patients. In SEVs from AD and PD patients, no  
221 mRNAs and lncRNAs were found to be deregulated with  $|\text{Log}_2\text{FC}|$  of 1.

222 Considering only lncRNAs, both SEVs and LEVs showed a mixed scenario between patients  
223 and controls, without any specific characterization of AD, FTD, ALS or PD (Figure 7a and  
224 7b).

225 In SEVs from FTD and ALS patients there were 235 genes in common and the common  
226 pathways of gene ontology biological processes (GO-BPs) were mRNA processing ( $p=6.133e-$   
227 15), RNA splicing, via transesterification reactions with bulged adenosine as nucleophile and  
228 via spliceosome (Figure 8a). In LEVs there were only 2 genes in common among PD, FTD and  
229 ALS: MAP3K7CL, a kinase gene, and AP003068, 23, a transcript of an unknown protein  
230 (Figure 8b).

231

## 232 **Specific miRNAs pathway analysis in SEVs and LEVs of NDs**

### 233 **1. MiRWalk analysis and Ingenuity Pathway Analysis in SEVs of NDs.**

234 Enriched pathways targeted by the miRNAs that were differentially expressed between disease  
235 samples and CTRs were investigated by MiRWalk (Table S3).

236 Reactome and Gene Ontology (GO) analysis for DE miRNAs were run only on differentially  
237 expressed miRNAs compared to CTRs and not in common with the other NDs (Table S3).

238 In SEVs from ALS patients Reactome analysis showed miRNAs involved in MECP2 (methyl  
239 CpG binding protein 2) expression and activity, Intracellular signaling by second messengers

240 and negative regulators of DDX58/IFIH1. IFIH1 and DDX58 encode retinoic acid-inducible  
241 gene I (RIG-I), cytosolic pattern recognition receptors function in viral RNA detection  
242 initiating an innate immune response through independent pathways that promote interferon  
243 expression [48]. Ingenuity pathway analysis confirmed regulation of the immune system by  
244 highlighting how miR31-5p and miR615-5p control CXCL8, C-X-C Motif Chemokine Ligand  
245 8 activated in viral infections and miR584-5p/miR148-5p control TMEM9, which enhances  
246 production of proinflammatory cytokines induced by TNF, IL1B, and TLR ligands [48]. GO-  
247 BPs found negative regulation of Ras protein signal transduction and very interestingly cell  
248 proliferation in forebrain.

249 In SEVs from FTD patients Reactome classified deregulated miRNAs in MyD88 cascade  
250 initiated on plasma membrane, diseases of signal transduction and axon guidance. GO-BPs  
251 classified deregulated miRNAs in SEVs from FTD in pathway release of cytochrome c from  
252 mitochondria, mitotic G1 DNA damage checkpoint and DNA damage response, signal  
253 transduction by p53 class mediator resulting in cell cycle arrest. IPA analysis (Figure 9b)  
254 confirmed involvement in MyD88 cascade (Adapter protein involved in the Toll-like receptor  
255 and IL-1 receptor signaling pathway in the innate immune response) and DNA damage  
256 response by regulation of miR146a-5p on RAD54, involved in homologous recombination and  
257 repair of DNA and on IL1F10 and TLR10 [49, 50] (Figure 9b).

258 In SEVs from PD patients Reactome analysis identified signaling by TGF-beta family  
259 members, SLC-mediated transmembrane transport (regulation of GRIA1, subunit of Glutamate  
260 receptors, by miR-132-3p, Metabolism of lipids, MyD88 cascade initiated on plasma

261 membrane (involvement of JAG1 and TNF regulated by miR-34-Sup IPA), while  
262 GeneOntology BP fibroblast migration, mRNA polyadenylation and positive regulation of  
263 gene silencing by miRNA (Figure 9c).

264 For AD, there were very few deregulated miRNAs to be classified in pathways.

265

## 266 **2. Up- and Down-regulated MiRWalk analysis in SEVs of NDs.**

267 Upregulated and downregulated miRNAs are listed in Table S4. In SEVs from ALS patients  
268 upregulated miRNAs could regulate MECP2, methyl CpG binding protein 2, expression and  
269 activity and RNA Polymerase III Transcription Initiation from Type 3 Promoter, while  
270 downregulated miRNAs regulate genes in post-translational protein modification and gene  
271 expression. In contrast to ALS, miRNAs only in SEVs from FTD patients are mainly  
272 downregulated compared to CTRs. These regulate genes in MyD88 cascade initiated on plasma  
273 membrane and in diseases of signal transduction. In SEVs from PD patients, the upregulated  
274 and downregulated miRNAs were not significantly associated with any biological pathways.

275

## 276 **3. MiRWalk analysis and Ingenuity Pathway Analysis in LEVs of NDs.**

277 Reactome underlined the role of miRNAs in LEVs: 1) from ALS patients in intracellular  
278 signaling by second messengers (DAG, cAMP, cGMP, IP3, Ca<sup>2+</sup> and phosphatidylinositols),  
279 signaling by TGF-beta family members, MyD88 cascade initiated on plasma membrane and  
280 metabolism of lipids; 2) from FTD patients in gene expression; 3) from PD patients in  
281 intracellular signaling by second messengers, SLC-mediated transmembrane transport (solute

282 carrier superfamily), some of which mediate neurotransmitter uptake in the CNS and peripheral  
283 nervous system (PNS) and metabolism of lipids.

284 Gene ontology analysis instead found pathways for LEVs: 1) from ALS patients regulation of  
285 G0 to G1 transition; 2) from FTD patients regulation of type I interferon-mediated signaling  
286 pathway and positive regulation of gene and posttranscriptional silencing; 3) from PD patients  
287 protein insertion into membrane, fibroblast apoptotic process, regulation of steroid biosynthetic  
288 process. Pathways are reported below in order of most significant p values and further details  
289 are shown in Table S3. IPA analysis confirmed the pathway found by both Reactome and Gene  
290 Ontology. 1) for LEVs from ALS regulation of p53 by mir-379, 378, 584-5p, 1207 emerged  
291 OR hsa-miR-199a-5p and hsa-miR-329a-5p regulate LCN2, lipocalin2, inducible factor  
292 secreted by reactive astrocytes in transgenic rats with neuronal expression of mutant human  
293 TDP-43 or RNA-binding protein FUS and that is selectively toxic to neurons [51] (Figure 10a);  
294 2) for LEVs from FTD patients regulation of genes like TP53 by miR-296 and RNA  
295 Polymerase II by miR-615 as well as Cyclin E regulated miR-615-5p, that might be part of  
296 gene expression and regulation of apoptosis [52] (Figure 10b); 3) for LEVs from PD patients  
297 regulation of ADAM9 (ADAM Metallopeptidase Domain 9), important in mediating cell-cell  
298 and cell-matrix interactions, by upregulation of miR-291, miRNA which regulates cell  
299 proliferation and resolvin, a metabolic byproduct of omega-3 fatty acids, regulated by miR-302  
300 [53,54] (Figure 10c).

301

302

303 **4. Up- and Down-regulated MiRWalk analysis in LEVs of NDs.**

304 In LEVs from ALS patients, upregulated miRNAs belong to MyD88 cascade initiated on  
305 plasma membrane and SLC-mediated transmembrane transport (solute carrier superfamily),  
306 some of which mediate neurotransmitter uptake in the CNS and PNS, while downregulated  
307 miRNAs were related to intracellular signaling by second messengers (Reactome).

308 In LEVs from FTD patients, miRNAs regulating MECP2 expression and activity, MAPK  
309 signaling pathway and metabolism of lipids were upregulated.

310 In LEVs from PD patients, interestingly, most of the miRNAs are upregulated and the classes  
311 identified belonged to RAB geranylgeranylation, involved in trafficking of proteins in the  
312 endolysosomal system and in metabolism of lipids (Table S4).

313 For AD either the differentially expressed miRNAs were few, so it was not possible to calculate  
314 any pathway.

315

316 **5. Pathways analysis of mRNAs in SEVs and LEVs**

317 EnrichR analysis (KEGG pathway and Gene Ontology (GO) analysis) for DEGs in FTD and  
318 ALS patients compared to healthy controls has been performed (Table S5). In ALS and FTD  
319 SEVs, GO BP analysis showed an important involvement of spliceosome and RNA  
320 metabolism as also reported above in section 3.2. The importance of transcription and RNA  
321 metabolism also emerged from KEGG analysis in SEVs and LEVs especially for ALS and for  
322 SEVs of FTD patients, showing an alteration of RNA degradation and transport pathways  
323 (Table S5). In LEVs of FTD patients, negative regulation of Ras protein signal transduction

324 and positive regulation of neuron death were the most significant classes. In LEVs for PD only  
325 13 genes were deregulated compared to CTRs and pathways like the biosynthesis of  
326 unsaturated fatty acids were statistically significant (Table S5).

327 We also looked at DEGs compared to CTRs and not in common to the other NDs. GO BP  
328 identified 1) in LEVs from ALS, positive regulation of transmembrane transport, positive  
329 regulation of leukocyte chemotaxis; 2) in LEVs from FTD cellular response to molecule of  
330 bacterial origin; 3) in LEVs from PD positive regulation of mitochondrial membrane  
331 permeability involved in apoptotic process, mitochondrial outer membrane permeabilization;  
332 4) in SEVs from ALS regulation of transcription from RNA polymerase II promoter, regulation  
333 of transcription, DNA-templated, negative regulation of gene expression; 5) in SEVs from FTD  
334 patients regulation of cellular catabolic process, phosphatidylinositol metabolic process,  
335 transcription initiation from RNA polymerase III promote (Table S6).

336

### 337 **Discussion**

338 Identifying robust biomarkers is essential for early diagnosis of NDs. Extracellular vesicles  
339 (SEVs and LEVs), transported in blood, might play this role. In this study, we have analyzed  
340 SEVs and LEVs cargo in order to detect RNAs acting as novel, easily accessible biomarkers  
341 for AD, PD, ALS and FTD.

342 We first compared miRNA and mRNA expression profiles of SEVs and LEVs in the same  
343 disease. We found a variable range of overlap between LEVs and SEVs: for miRNAs in SEVs  
344 the percentage was between 18.2-61.5% and in LEVs 25.2-46.2% and for mRNAs 8.4 and



345 17.1% for SEVs and 35.5 and 34.2 for ALS and FTD patients (Table 5). Although there is some  
346 overlap between the two types of EVs, there is a significant difference that may justify, as we  
347 already described for dimension, protein and lipid loading [35,40,55], the different functions  
348 of LEVs and SEVs in plasma of ND patients. Conley et al. characterized protein coding  
349 transcripts in SEVs and LEVs from breast cancer patients by RNA-Seq and identified a small  
350 fraction of transcripts that were expressed at significantly different levels in large oncosomes  
351 and exosomes, suggesting they may mediate specialized functions [56].

352 Regarding common deregulated miRNAs in LEVs and SEVs in ALS, our data showed an  
353 important deregulation in a small group of specific miRNAs already described in the literature  
354 (hsa-miR-206, hsa-miR-205-5p, miR-1-3p, hsa-miR-205-5p, hsa-miR-200b-3p, hsa-miR-  
355 200c-3p, hsa-miR-6888-3p, hsa-miR-31-5p, hsa-miR-141-3p, hsa-miR-210-3p). MiR-206 is  
356 the main described miRNA associated to ALS [57,58]. MiR-1 and miR-206 has already been  
357 described to be deregulated in ALS patients [57,59], while in previous studies miR-141 and  
358 miR-200 were reported as related to ALS since they bind a sequence in FUS promoter and  
359 these mRNAs are linked by a feed-forward regulatory loop where FUS upregulates miR-  
360 141/200a, which in turn impact FUS protein synthesis [60,61]. Also, miR-210 is already known  
361 to be up-regulated in neurodegenerative diseases [62]. To our knowledge, remaining miRNAs  
362 deregulation was never reported as associated to ALS and may represent novel biomarkers  
363 specific for this disease.

364 We then analyzed deregulated miRNAs and mRNAs among the four NDs by the principal  
365 component analysis (PCA). We found that deregulated miRNAs cargo of the four NDs was

366 different from CTRs in particular in SEVs, while in in LEVs the only group that did not overlap  
367 with CTRs was ALS, and so it was for PCA related to mRNAs in LEVs and SEVs. Specifically,  
368 in PCA of miRNAs of SEVs the three groups, CTRs, ALS and AD, were well separated  
369 suggesting that miRNAs cargo of SEVs might be bound to ND phenotypes. On the other hand,  
370 miRNAs split the group of PD patients in two, one overlapped with AD and the other with FTD  
371 patients. The overlap of miRNA signature cannot be justified by similar clinical phenotypes  
372 among the groups of patients: of the five PD patients which overlap with AD patients, only one  
373 displayed cognitive deficit and the other one had Lewy Body Dementia. Also, FTD patients  
374 showed two subgroups, one overlapping with PD and the other with ALS. Multiple studies  
375 [63,64,65] already demonstrated that the observed overlap between FTD and ALS is due to  
376 common mechanisms contributing to the onset and development of the disease. Also in this  
377 case there is no correlation with the clinical history. Parkinsonism is found in approximately  
378 20–30% of patients in FTLT, in particular it is frequently observed in familial FTD, with  
379 mutations linked to microtubule associated protein Tau (MAPT), progranulin (GRN or PGRN),  
380 and chromosome 9 open reading frame 72 (C9ORF72) repeat expansion [66]. In our cohort,  
381 only one FTD patient presented parkinsonism, which, however, clustered in the ALS group  
382 and did not present any mutation in the canonical genes associated to familial FTD. All FTD  
383 patients showed variable amounts of Tau,  $\beta$ amyloid 1-42 and only two patients presented ALS-  
384 FTD disease.

385 As shown in Table 3 and Table 4, EVs were enriched with a greater number of DE miRNAs  
386 compared to mRNAs. In diseases like ALS and FTD, SEVs were enriched also with a greater

387 number of deregulated mRNAs, while diseases like PD and in particular AD have a minor  
388 number of DE mRNA compared to CTRs. It is also clear that SEVs are more enriched in  
389 deregulated miRNAs compared to LEVs. This is in agreement with the literature demonstrating  
390 that SEVs contain primarily small RNA [67]. In fact, in the panel of neurodegeneration, the  
391 data about RNA metabolism and AD are few [68], suggesting that the RNA regulation does  
392 not have a fundamental role in the mechanism of the pathology.

393 Common miRNAs in the four NDs were different between the two groups of EVs. Enriched  
394 pathways of common miRNAs found with MiRWalk showed pathway like Ubiquitin mediated  
395 proteolysis, MAPK signaling pathway, Toll-like receptor signaling pathways for SEVs and  
396 TGF-beta signaling pathway, Neurotrophin signaling pathway, MAPK signaling pathway,  
397 Glycosphingolipid biosynthesis, Ras signaling pathway for LEVs. It is interesting how  
398 deregulated common miRNAs both in LEVs and SEVs are involved in signal transduction.  
399 Although recent reports have implicated EVs in intercellular signaling [69], their influence in  
400 modulating signaling pathways in the target cells is not fully clear.

401 For the common enriched pathway of SEVs in the four NDs, it is known that many NDs are  
402 related to inflammation, which can increase cell injury and cause neuronal death. Toll like  
403 receptors (TLR) are innate immune receptors that, when activated, can induce the downstream  
404 signal molecules through the MyD88-dependent and TRIF signal adaptor proteins, which  
405 activate downstream kinases including I $\kappa$ B kinases and MAP kinases. In general, TLRs are  
406 expressed in the CNS, in neurons (TLR3, 4, 7, and 9), in human oligodendrocytes (TLR2), in  
407 human astrocytes (TLR3-4), and in human microglia (TLR1-4). Activation of both endosomal

408 and plasma membrane receptors like TLRs can activate microglia and control the evolution of  
409 neurodegenerative processes [70].

410 Ubiquitin mediated proteolysis is the process of degradation of a protein via the ubiquitin  
411 system [71] and it is one of the common pathways of SEVs from the four NDs that we found.  
412 NDs are characterized by intraneuronal inclusions containing ubiquitynated filamentous  
413 protein aggregates, given by loss of function or mutations in enzymes of the ubiquitin  
414 conjugation/deconjugation pathway [72]. If there is an impairment of the ubiquitin mediated  
415 proteolysis, SEVs, which originate in the endocytic pathway, (differently from LEVs, which  
416 are shed from the budding of the cell membrane) might be the affected key part of the  
417 machinery as already suggested. In fact, the incorporation of ubiquitinated proteins into  
418 intraluminal vesicles (ILVs) is controlled through the Endosomal Sorting Complexes Required  
419 for Transport, ESCRT complex, key part of SEVs [73].

420 For LEVs, Neurotrophin signaling pathway, also called nerve growth factor (NGF) family  
421 members pathway, has multiple functions in both developing and mature neurons and it is  
422 connected to the downstream MAPK and Ras signaling pathway. On activation by BDNF, trkB  
423 initiates intracellular signaling through Shc and PLC $\gamma$  binding sites. The Shc binding site plays  
424 major roles in neuronal survival and axonal outgrowth [74]. Another common deregulated  
425 pathway is glycosphingolipid biosynthesis pathway. Increasing evidence underlines the  
426 activation of ceramide-dependent pro-apoptotic signaling and reduction of neuroprotective S1P  
427 in neurodegeneration course. One hypothesis is the link between altered ceramide/S1P and the  
428 production, secretion, and aggregation of pathological proteins in NDs. Sphingolipids regulate

429 EVs and the spread or release of neurotoxic proteins and/or regulatory miRNAs between brain  
430 cells [75].

431 The expression profile of some miRNAs has already been described in the brain or in blood of  
432 some NDs, but with an opposite regulatory pattern to the one found in EVs of our study.

433 For example, miR-133b expression is downregulated in the midbrain of PD patients and in an  
434 animal model of PD, while in SEVs is upregulated [76]. miR-4781-3p was instead found  
435 upregulated in blood of AD patients by RNAseq, while in SEVs of the four NDs, this miRNA  
436 is downregulated in SEVs [77]. miR-323-3p associated with inflammatory responses, has been  
437 proposed as a target for therapy in AD and it is found downregulated in SEVs [78]. Some of  
438 these miRNAs have not been found in neurodegeneration, and some only in one of the NDs  
439 studied in this work. Further studies are needed in this regard and specific miRNAs and  
440 pathways will be discussed in future works for each disease in future works.

441 In this report, we have also investigated the regulation of coding and lncRNAs. Coding RNAs  
442 showed a similar picture to miRNAs pattern for ALS disease. As for miRNAs, coding RNAs  
443 in SEVs of ALS better separate from other disease compared to CTRs. Notably, in the list of  
444 deregulated mRNAs in ALS patients, we have found 3 RNA Binding Motif Protein, a protein  
445 family already associated to ALS [79]. In contrast, deregulated lncRNAs did not cluster apart  
446 in the different diseases and, in AD and PD patients, no lncRNAs were found to be deregulated.  
447 Of the common genes between ALS and FTD, they were mainly classified as belonging to  
448 splicing, a mechanism largely described in those two NDs [80]. Further studies are needed on  
449 extended cohorts of patients with different stages of the disease in order to understand if the

450 deregulation of these RNAs may be associated to a specific clinical window (disease onset and  
451 outcome) and progression of the disease.

452

### 453 **Conclusions**

454 We found different deregulation of miRNAs and mRNAs between SEVs and LEVs from  
455 plasma of patients in four NDs.

456 Deregulated cargo in SEVs may be a starting point for a specific signature for ALS disease,  
457 paving the way for future studies on a specific small group of miRNAs that may become  
458 peripheral ALS biomarkers.

459 We found a common signature of miRNAs in SEVs and LEVs among the four NDs and those  
460 miRNAs are involved in pathways already known in neurodegeneration.

461 The novelty is that different EVs are involved in different pathways and this might give a  
462 specificity to the role of SEVs and LEVs in the spreading/protection of the disease.

### 463 **Abbreviations**

464 **AD**-Alzheimer's Disease

465 **ALS**-Amyotrophic Lateral Sclerosis

466 **CTRs**- healthy controls

467 **DE miRNAs**-differentially expressed miRNAs

468 **DE mRNA**- differentially expressed mRNAs

469 **ESCRT**-Endosomal Sorting Complexes Required for Transport

- 470 **EVs**-extracellular vesicles
- 471 **EXOs**-exosomes
- 472 **FTD**-Frontotemporal Dementia
- 473 **GWAS**-Genome-wide association studies
- 474 **ILVs**- intraluminal vesicles
- 475 **IPA**-Ingenuity pathway analysis
- 476 **LBs**-Lewy bodies
- 477 **LEVs**-large extracellular vesicles
- 478 **lncRNA**-long non coding RNA
- 479 **miRNA**-microRNA
- 480 **MVs**-microvesicles
- 481 **NDs**- neurodegenerative diseases
- 482 **PCA**-principal component analysis
- 483 **PD**-Parkinson's Disease
- 484 **RBPs**-RNA-binding proteins
- 485 **SEVs**-small extracellular vesicles
- 486 **SN**-substantia nigra
- 487 **SNPs**-single nucleotide polymorphisms,

488 **TLRs**-Toll like receptors,

## 489 **Declarations**

### 490 **Ethical Approval and Consent to participate**

491 Subjects participating in the study signed, before being enrolled, an informed consent form approved by the  
492 Ethical Committee of IRCCS Mondino Foundation, Pavia, Italy (for ALS patients Protocol n°-20180034329; for  
493 PD patients Protocol n°20170001758; for AD patients Protocol n°20170016071; for FTD patients Protocol  
494 n°20180049077).

495

### 496 **Consent for publication**

497 Not applicable

498

### 499 **Availability of data and materials**

500 The datasets supporting the conclusions of this article are included within the article and its additional files.

### 501 **Competing interests**

502 The authors declare no conflict of interest.

### 503 **Funding**

504 This research was funded by Italian Ministry of Health (Grant N°5\*1000 anno 2016, Ricerca Corrente 2018–  
505 2020, Young research project GR-2016-02361552); Fondazione Regionale per la Ricerca Biomedica for  
506 TRANS–ALS (FRRB 2015-0023); Fondazione Cariplo 2017 (Extracellular vesicles in the pathogenesis of  
507 Frontotemporal Dementia 2017-0747; Association between frailty trajectories and biological markers of aging  
508 2017-0557).

### 509 **Authors' contributions**

510 Writing— review and editing, S.G., D.S. and S.Z.; D.S., M.A. and M.G. performed the experiments. R.C., S.Z.,  
511 and M.O. performed bioinformatic analysis. S.B., M.A., A.C., B.M., G.P., L.D., R.Z., M.C.R., M.C. participated  
512 to patients and controls recruitment. M.A., D.S., O.P. and C.C. set up the experimental plan. O.P., R.C. and  
513 C.C. review. R.C. and C.C. supervision. All authors reviewed and accepted the final version of this manuscript.

514

515

516

517

518



519 **Acknowledgements**

520 We kindly thank Prof. Fabio Corsi and Mr. Raffaele Allevi (Dipartimento di Scienze Biomediche e Cliniche  
521 “L. Sacco”) for TEM images and analysis. We thank patients and family for contributing to this study.

522 **Author details**

523 <sup>1</sup>Genomic and post-Genomic Center, IRCCS Mondino Foundation, Pavia, Italy. <sup>2</sup>Department of Molecular  
524 Biotechnology and Health Sciences, Bioinformatics and Genomics Unit, University of Turin, Italy. <sup>3</sup>Department  
525 of Brain and Behavioral Sciences, University of Pavia, Pavia, Italy. <sup>4</sup>Department of Biology and Biotechnology  
526 (“L. Spallanzani”), University of Pavia, Pavia, Italy. <sup>5</sup>Department of Oncology, University of Torino, Italy.  
527 <sup>6</sup>Departments of Neurosciences, University of New Mexico School of Medicine, Albuquerque, NM, USA.  
528 <sup>7</sup>Immunohematological and Transfusional Service and Centre of Transplantation Immunology, IRCCS "San  
529 Matteo Foundation", Pavia, Italy. <sup>8</sup>Neurorehabilitation Unit, IRCCS Mondino Foundation, Pavia, Italy. <sup>9</sup>Unit  
530 of Behavioral Neurology, IRCCS Mondino Foundation, and University of Pavia, Pavia, Italy. <sup>10</sup>Departments of  
531 Neurosciences and Psychiatry and Behavioral Health, University of New Mexico School of Medicine,  
532 Albuquerque, NM, USA

533

534

535

536

537

538

539

540

541

542

543

544

## 545 **References**

546

- 547 1. Gitler, A.D., Dhillon, P., Shorter, J. Neurodegenerative disease: models, mechanisms,  
548 and a new hope. *Dis Model Mech.* 2017, 10: 499- Habib R, et al. Decoding common  
549 features of neurodegenerative disorders: from differentially expressed genes to pathways.  
550 *Curr Genomics*, , 19, 4, 300-312 (2018)
- 551 2. Habib, R., Noreen, N., Nadeem, N. Decoding Common Features of  
552 Neurodegenerative Disorders: From Differentially Expressed Genes to Pathways. *Curr*  
553 *Genomics*, 19, 4, 300-312 (2018)
- 554 3. Montie, H., Durcan, T.M. The cell and molecular biology of neurodegenerative  
555 diseases: an overview. *Front Neurol*, 4, 194 (2013)
- 556 4. García, J.C, Bustos R.H. The Genetic Diagnosis of Neurodegenerative Diseases and  
557 Therapeutic Perspectives. *Brain Sci*, 8, 12 (2018)
- 558 5. Spires-Jones T.L., Attems J., Thal D.R. Interactions of pathological proteins in  
559 neurodegenerative diseases. *Acta Neuropathol.* 134, 2, 187-205 (2017).
- 560 6. Calderon-Garcidueñas, A.L., Charles Duyckaerts, C. Alzheimer disease. *Hand b Clin*  
561 *Neurol*, 145, 325-337 (2017)
- 562 7. Obeso, J.A., Stamelou, M., Goetz, C.G., et al. Past, present, and future of Parkinson's  
563 disease: A special essay on the 200th Anniversary of the Shaking Palsy. *Mov Disord*, , 32,  
564 9, 1264-1310 (2017)
- 565 8. Cereda, C., Leoni, E., Milani, P., Pansarasa, O., Mazzini, G., Guareschi, S., Alvisi, E.,  
566 Ghiroldi, A., Diamanti, L., Bernuzzi, S., et al. Altered intracellular localization of SOD1 in  
567 leukocytes from patients with sporadic amyotrophic lateral sclerosis. *PLoS ONE*, 8,  
568 e75916 (2013)
- 569 9. Guareschi, S., Cova, E., Cereda, C., Ceroni, M., Donetti, E., Bosco, D.A., Trotti, D.,  
570 Pasinelli, P. An over-oxidized form of superoxide dismutase found in sporadic amyotrophic  
571 lateral sclerosis with bulbar onset shares a toxic mechanism with mutant sod1. *Proc. Natl.*  
572 *Acad. Sci. USA*, 109, 5074–5079 (2012)
- 573 10. Gagliardi, S., Cova, E., Davin, A., Guareschi, S., Abel, K., Alvisi, E., Laforenza, U.,  
574 Ghidoni, R., Cashman, J.R., Ceroni, M., Cereda C. SOD1 mRNA expression in sporadic  
575 amyotrophic lateral sclerosis. *Neurobiol. Dis*, 39, 198–203 (2010)
- 576 11. Arai, T., Hasegawa, M., Akiyama, H., Ikeda, K., Nonaka, T., Mori, H., Mann, D.,  
577 Tsuchiya, K., Yoshida, M., Hashizume, Y., & Oda, T. TDP-43 is a component of ubiquitin-  
578 positive tau-negative inclusions in frontotemporal lobar degeneration and amyotrophic  
579 lateral sclerosis. *Biochem Biophys Res Commun.* 351, 3, 602-611 (2006)
- 580 12. Bott, N.T., Radke A., Stephens, M.L., Kramer, J.H. Frontotemporal dementia:  
581 diagnosis, deficits and management. *Neurodegener Dis Manag.* 4, 6, 439-54 (2014)

- 582 13. Götzl, J.K., Lang, M.C., Haass, C., Capell, A. Impaired protein degradation in FTL D  
583 and related disorders. *Ageing Res Rev*, 32, 122-139 (2016)
- 584 14. Mackenzie, I.R., Neumann, M., Bigio, E.H., Cairns, N.J., Alafuzoff, I., Kril, J.,  
585 Kovacs, G.G., Ghetti, B., Halliday, G., Holm, I.E., Ince, P.G., Kamphorst, W., Revesz,  
586 T., Rozemuller, A.J.M., Kumar-Singh S., Akiyama, H., Baborie, A., Spina, S.,  
587 Dickson, D.W., Trojanowski J.Q., Mann D.M.A. Nomenclature and nosology for  
588 neuropathologic subtypes of frontotemporal lobar degeneration: an update. *Acta*  
589 *Neuropathol*, 119, 1–4 (2010)
- 590 15. Neumann, M., Sampathu, D.M., Kwong, L.K., Truax, A.C., Micsenyi, M.C., Chou,  
591 T.T., Bruce, J., Schuck, T., Grossman, M., Clark, C.M., McCluskey, L.F., Miller, B.L.,  
592 Masliah, E., Mackenzie, I.R., Feldman, H., Feiden, W., Kretzschmar, H.A., Trojanowski,  
593 J.Q., Lee, V.M. Ubiquitinated TDP-43 in frontotemporal lobar degeneration and  
594 amyotrophic lateral sclerosis. *Science*, 314, 130–133 (2006).
- 595 16. Forloni G, Balducci C. Alzheimer's Disease, oligomers, and inflammation. *J*  
596 *Alzheimers Dis*, 62, 3, 1261-1276 (2018)
- 597 17. Pansarasa, O., Bordoni, M., Drufulca, L., Diamanti, L., Sproviero, D., Trotti R.,  
598 Bernuzzi, S., La Salvia, S., Gagliardi, S., Ceroni, M., Cereda, C. ALS lymphoblastoid cell  
599 lines as a considerable model to understand disease mechanisms. *Dis Model Mech*, 26, 11,  
600 3, pii: dmm031625 (2018)
- 601 18. Singh, S.K., Dutta, A., Modi, G.  $\alpha$ -Synuclein aggregation modulation: an emerging  
602 approach for the treatment of Parkinson's disease. *Future Med Chem*. 9, 10, 1039-1053  
603 (2017)
- 604 19. Milani, P., Ambrosi, G., Gammoh, O., Blandini, F., Cereda, C. SOD1 and DJ-1  
605 converge at Nrf2 pathway: a clue for antioxidant therapeutic potential in  
606 neurodegeneration. *Oxid Med Cell Longev*, 2013, 836760 (2013)
- 607 20. Cova, E., Bongioanni, P., Cereda, C., Metelli, M.R., Salvaneschi, L., Bernuzzi, S.,  
608 Guareschi, S., Rossi, B., Ceroni, M. Time course of oxidant markers and antioxidant  
609 defenses in subgroups of amyotrophic lateral sclerosis patients. *Neurochem Int*. 56, 5, 687-  
610 93 (2010)
- 611 21. Belzil, V.V., Gendron, T.F., and Petrucelli, L. RNA-mediated toxicity in  
612 neurodegenerative disease. *Mol. Cell. Neurosci*, 56, 406-419 (2013)
- 613 22. Ling, S.C., Polymenidou, M., Cleveland, D.W. Converging mechanisms in ALS and  
614 FTD: disrupted RNA and protein homeostasis. *Neuron*, 79, 416-438, (2013)
- 615 23. Liu, E.Y., Cali, C.P., Lee, E.B. RNA metabolism in neurodegenerative disease. *Dis*  
616 *Model Mech*, 10, 5, 509-518 (2017)
- 617 24. Iraci, N., Leonardi, T., Gessler, F., Vega, B., Pluchino, S. Focus on Extracellular  
618 Vesicles: Physiological Role and Signalling Properties of Extracellular Membrane Vesicles.  
619 *Int. J. Mol. Sci*, 17, 171, (2016)
- 620 25. Fiandaca, M.S., Kapogiannis, D., Mapstone, M., Boxer, A., Eitan, E., Schwartz,  
621 J.B., Abner, E.L., Petersen, R.C., Federoff, H.J., Miller B.L., Goetzl E.J. Identification of

- 622 preclinical Alzheimer's disease by a profile of pathogenic proteins in neurally derived  
623 blood exosomes: a case-control study. *Alzheimers Dement*, 11, 600.e1–607.e1 (2015)
- 624 26. Goetzl, E. J., Boxer, A., Schwartz, J. B., Abner, E. L., Petersen, R. C., Miller, B. L.,  
625 Kapogiannis, D. Altered lysosomal proteins in neural-derived plasma exosomes in  
626 preclinical Alzheimer disease. *Neurology*, 85, 40–47, (2015a)
- 627 27. Fatima, F., Nawaz, M. Vesiculated Long Non-Coding RNAs: Offshore Packages  
628 Deciphering Trans-Regulation between Cells, Cancer Progression and Resistance to  
629 Therapies. *Non-Coding RNA*, 3, 10 (2017)
- 630 28. Matsumoto, J., Stewart, T., Banks, W.A., Zhang, J. The Transport Mechanism of  
631 Extracellular Vesicles at the Blood-Brain Barrier. *Curr Pharm Des*, 23, 40, 6206-6214  
632 (2017)
- 633 29. Cocucci, E., Meldolesi, J. Ectosomes and exosomes: shedding the confusion between  
634 extracellular vesicles. *Trends Cell Biol*, 25, 6, 364-72 (2015)
- 635 30. Raposo, G., Stoorvogel, W. Extracellular vesicles: exosomes, microvesicles, and  
636 friends. *J Cell Biol*, 18, 200, 4, 373-83 (2013)
- 637 31. Théry, C., Witwer, K.W., Aikawa, E., Alcaraz, M. J., Anderson, J. D.,  
638 Andriantsitohaina, R., Antoniou, A., Arab, T., Archer, F., Atkin-Smith, G.K., Ayre, D.C.,  
639 Bach, J.M., Bachurski, D., Baharvand, H., Balaj, L., Baldacchino, S., Bauer, N.N., Baxter,  
640 A.A., Bebawy, M., Beckham, C., ... Zuba-Surma, E.K. Minimal information for studies of  
641 extracellular vesicles 2018 (MISEV2018): a position statement of the International Society  
642 for Extracellular Vesicles and update of the MISEV2014 guidelines. *JEVs*, 7, 1535750  
643 (2018)
- 644 32. Yao, Y. F., Qu, M. W., Li, G. C., Zhang, F. B., and Rui, H. C. Circulating exosomal  
645 miRNAs as diagnostic biomarkers in Parkinson's disease. *Eur. Rev. Med. Pharmacol. Sci*,  
646 22, 5278–5283 (2018)
- 647 33. Gámez-Valero, A., Campdelacreu, J., Vilas, D., Ispuerto, L., Reñé, R., Álvarez, R.,  
648 Armengol, M.P., Borràs, F.E., Beyer, K. Exploratory study on microRNA profiles from  
649 plasma-derived extracellular vesicles in Alzheimer's disease and dementia with Lewy  
650 bodies. *Transl Neurodegener*, 8, 31 (2019)
- 651 34. Katsu, M., Hama, Y., Utsumi, J., Takashina, K., Yasumatsu, H., Mori, F.,  
652 Wakabayashi, K., Shoji, M., Sasaki, H. MicroRNA expression profiles of neuron-derived  
653 extracellular vesicles in plasma from patients with amyotrophic lateral sclerosis. *Neurosci*  
654 *Lett*, 708, 134176 (2019)
- 655 35. Sproviero, D., La Salvia, S., Giannini, M., Crippa, V., Gagliardi, S., Bernuzzi, S.,  
656 Diamanti, L., Ceroni, M., Pansarasa, O., Poletti, A., Cereda, C. Pathological proteins are  
657 transported by extracellular vesicles of sporadic amyotrophic lateral sclerosis patients.  
658 *Front Neurosci*, 19, 12, 487 (2018)
- 659 36. McKhann, G.M., Knopman, D.S., Chertkow, H., Hyman, B.T., Jack, C.R., Jr., Kawas,  
660 C.H., et al. The diagnosis of dementia due to Alzheimer's disease: recommendations from  
661 the national institute on aging-alzheimer's association work groups on diagnostic guidelines  
662 for alzheimer's disease. *Alzheimers Dement*, 7, 263–269 (2011)

- 663 37. Postuma, R.B., Berg, D., Stern, M., Poewe, W., Olanow, C.W., Oertel, W., Obeso, J.,  
664 Marek, K., Litvan, I., Lang, A.E., Halliday, G., Goetz, C.G., Gasser, T., Dubois, B., Chan,  
665 P., Bloem, B.R., Adler, C.H., Deuschl, G. MDS clinical diagnostic criteria for Parkinson's  
666 disease. *Mov Disord*, 30, 12, 1591-601 (2015)
- 667 38. Chare, L., Hodges, J.R., Leyton, C.E., McGinley, C., Tan, R.H., Kril J.K., Halliday,  
668 G.M. New criteria for frontotemporal dementia syndromes: clinical and pathological  
669 diagnostic implications. *J Neurol Neurosurg Psychiatry*, 85, 8, 865-70 (2014)
- 670 39. Brooks, B.R., Miller, R.G., Swash, M., Munsat, T.L., World Federation of Neurology  
671 Research Group on Motor Neuron Diseases. El Escorial revisited: revised criteria for the  
672 diagnosis of amyotrophic lateral sclerosis. *Amyotroph Lateral Scler Other Motor Neuron*  
673 *Disord*, 1, 5, 293-9 (2000)
- 674 40. Sproviero, D., La Salvia, S., Colombo, F., Zucca, S., Pansarasa, O., Diamanti, L.,  
675 Costa, A., Lova, L., Giannini, M., Gagliardi, S., Lauranzano, E., Matteoli, M., Ceroni, M.,  
676 Malaspina, A., Cereda, C. Leukocyte derived microvesicles as disease progression  
677 biomarkers in slow progressing amyotrophic lateral sclerosis patients. *Front Neurosci*, 13,  
678 344 (2019)
- 679 41. Kulkarni, N., Alessandri, L., Panero, R., Arigoni, M., Olivero, M., Ferrero, G.,  
680 Cordero, F., Beccuti, M., Calogero, R.A. Reproducible bioinformatics project: a  
681 community for reproducible bioinformatics analysis pipelines. *BMC bioinformatics*, 19,  
682 349 (2018)
- 683 42. Cordero, F., Beccuti, M., Arigoni, M., Donatelli, S., Calogero, R.A. Optimizing a  
684 massive parallel sequencing workflow for quantitative miRNA expression analysis. *PLoS*  
685 *ONE*, 7, 2, e31630 (2012)
- 686 43. Gagliardi, S., Zucca, S., Pandini, C., Diamanti, L., Bordoni, M., Sproviero, D., Arigoni,  
687 M., Olivero, M., Pansarasa, O., Ceroni, M., Calogero, R., Cereda, C. Long non-coding and  
688 coding RNAs characterization in peripheral blood mononuclear cells and spinal cord from  
689 amyotrophic lateral sclerosis patients. *Sci Rep*, , 8, 1, 2378 (2018)
- 690 44. Zucca, S., Gagliardi, S., Pandini, C., Diamanti L, Bordoni M, Sproviero D, Arigoni M,  
691 Olivero M, Pansarasa O, Ceroni M, Calogero R, Cereda C. RNA-Seq profiling in peripheral  
692 blood mononuclear cells of amyotrophic lateral sclerosis patients and controls. *Sci Data*,  
693 6, 190006 (2019)
- 694 45. Langfelder, P. and Horvath, S. WGCNA: an R package for weighted correlation  
695 network analysis. *BMC bioinformatics*, 9, 1, 559 (2008)
- 696 46. Kuleshov, M.V. , Jones, M.R., Rouillard, A.D., Fernandez N.F. , Duan, Q., Wang, Z.,  
697 Koplev, S., Jenkins S.L., Jagodnik K.M., Lachmann, A., McDermott, M.G., Monteiro,  
698 C.D., Gundersen G.W., Ma'ayan, A. Enrichr: a comprehensive gene set enrichment analysis  
699 web server 2016 update. *Nucleic Acids Research*, 8,44, W1, W90-7 (2016)
- 700 47. Chen, E.Y., Tan, C.M., Kou, Y., Duan, Q., Wang, Z., Meirelles, G.V., Clark, N.R.,  
701 Ma'ayan, A. Enrichr: interactive and collaborative HTML5 gene list enrichment analysis  
702 tool. *BMC Bioinformatics*, 128, 14 (2013)

- 703 48. Bowie, A.G., Unterholzner, L. Viral evasion and subversion of pattern-recognition  
704 receptor signalling. *Nat Rev Immunol*, 8, 12, 911-922 (2008)
- 705 49. Mazin, A.V., Mazina, O.M., Bugreev, D.V., Rossi, M.J. Rad54, the motor of  
706 homologous recombination. *DNA Repair (Amst)*, 9, 3, 286-302 (2010)
- 707 50. Kawai T, Sato S, Ishii KJ, et al. Interferon-alpha induction through Toll-like receptors  
708 involves a direct interaction of IRF7 with MyD88 and TRAF6. *Nat Immunol*, 5, 10, 1061-  
709 1068 (2004)
- 710 51. Bi, F., Huang, C., Tong, J., Qiu, G., Huang, B., Wu, Q., Li, F., Xu, Z., Bowser, R., Xia,  
711 X.G., Zhou, H. Reactive astrocytes secrete lcn2 to promote neuron death. *Proc Natl Acad  
712 Sci U S A*, 110, 10, 4069-74 (2013)
- 713 52. Liu, C., Yao, M. D., Li, C. P., Shan, K., Yang, H., Wang, J. J., Liu, B., Li, X. M., Yao,  
714 J., Jiang, Q., & Yan, B. Silencing Of Circular RNA-ZNF609 Ameliorates Vascular  
715 Endothelial Dysfunction. *Theranostics*, 7, 11, 2863–2877 (2017)
- 716 53. Wang, Y., Baskerville, S., Shenoy, A., Babiarz, J. E., Baehner, L., & Blelloch, R.  
717 Embryonic stem cell-specific microRNAs regulate the G1-S transition and promote rapid  
718 proliferation. *Nature genetics*, 40, 12, 1478–1483 (2008)
- 719 54. Recchiuti, A., Krishnamoorthy, S., Fredman, G., Chiang, N., Serhan, C.N. MicroRNAs  
720 in resolution of acute inflammation: identification of novel resolvin D1-miRNA circuits.  
721 *FASEB J*, 25, 544–60 (2011)
- 722 55. Morasso, C. F., Sproviero, D., Mimmi, M. C., Giannini, M., Gagliardi, S., Vanna, R.,  
723 Diamanti, L., Bernuzzi, S., Piccotti, F., Truffi, M., Pansarasa, O., Corsi, F., & Cereda, C.  
724 Raman Spectroscopy reveals biochemical differences in plasma derived extracellular vesicles  
725 from sporadic Amyotrophic Lateral Sclerosis patients. *Nanomedicine.*; 102249 (2020)
- 726 56. Conley, A., Minciacchi, V. R., Lee, D. H., Knudsen, B. S., Karlan, B. Y., Citrigno, L.,  
727 Viglietto, G., Tewari, M., Freeman, M. R., Demichelis, F., & Di Vizio, D. High-throughput  
728 sequencing of two populations of extracellular vesicles provides an mRNA signature that  
729 can be detected in the circulation of breast cancer patients. *RNA biology*, 14, 3, 305–316  
730 (2017)
- 731 57. Waller, R., Goodall, E.F., Milo M., Cooper-Knock, J., Da Costa, M., Hobson, E.,  
732 Kazoka, M., Wollff, H., Heath, P.R., Shaw, P.J., Kirby, J. Serum miRNAs miR-206, 143-  
733 3p and 374b-5p as potential biomarkers for amyotrophic lateral sclerosis (ALS). *Neurobiol  
734 Aging*, 55, 123-13 (2017)
- 735 58. de Andrade, H. M., de Albuquerque, M., Avansini, S. H., de S Rocha, C., Dogini, D.  
736 B., Nucci, A., Carvalho, B., Lopes-Cendes, I., & França, M. C., Jr. MicroRNAs-424 and  
737 206 are potential prognostic markers in spinal onset amyotrophic lateral sclerosis. *J Neurol  
738 Sci*, 368, 19–24 (2016)
- 739 59. Raheja, R., Regev, K., Healy, B.C., Mazzola, M.A., Beynon, V., Von Glehn, F., Paul,  
740 A., Diaz-Cruz, C., Gholipour, T., Glanz, B.I., Kivisakk, P., Chitnis, T., Weiner, H.L.,  
741 Berry, J.D., Gandhi, R. Correlating serum micrnas and clinical parameters in  
742 amyotrophic lateral sclerosis. *Muscle Nerve*, 58, 2, 261–269 (2018)

- 743 60. Volonte, C., Apolloni, S., Parisi, C. MicroRNAs: newcomers into the ALS picture.  
744 *CNS Neurol Disord Drug Targets*. 14, 2, 194-207 (2015)
- 745 61. Dini Modigliani, S., Morlando, M., Errichelli, L., Sabatelli, M., Bozzoni, I. An ALS-  
746 associated Mutation in the FUS 3'-UTR Disrupts a microRNA-FUS Regulatory Circuitry.  
747 *Nat Commun*, 5, 4335 (2014)
- 748 62. Williams, S.M., Nithianantharajah, J., Claudianos, C. Hypoxia-induced microRNA-210  
749 targets neurodegenerative pathways. *Noncoding RNA* 2018, 4, 2.
- 750 63. Ferrari, R., Kapogiannis, D., Huey, E.D., Momeni, P. FTD and ALS: a tale of two  
751 diseases. *Curr Alzheimer Res.*, 8, 3, 273-294 (2011)
- 752 64. Achi, E.Y., Rudnicki, S.A. ALS and Frontotemporal Dysfunction: A Review, *Neurol*  
753 *Res Int*, 806306 (2012)
- 754 65. Liscic, R.M. ALS and FTD: Insights into the disease mechanisms and therapeutic  
755 targets, *Eur J Pharmacol*, 2017, 15, 817, 2-6.
- 756 66. Park, H.K., Chung, S.J. New perspective on parkinsonism in frontotemporal lobar  
757 degeneration. *J Mov Disord*, 6, 1, 1-8 (2013)
- 758 67. Crescitelli, R., Lässer, C., Szabó, T.G., AKittel, M.E., Dianzani, I., Buzás, E.I., and  
759 Lötvald J. Distinct RNA profiles in subpopulations of extracellular vesicles: apoptotic  
760 bodies, microvesicles and exosomes. *JEVs*, 2 (2013)
- 761 68. Guerrero, E.N., Wang, H., Mitra, J., Hedge P.M., Stowell, S.E., Liachko, N.F.,  
762 Kraemer, B.C., Garruto, R.M., Rao, K.S. and Hedge, M.L. TDP-43/FUS in motor neuron  
763 disease: complexity and challenges. *ProgNeurobiology*, 145-146, 78-97 (2016)
- 764 69. Yáñez-Mó, M., Siljander, P. R., Andreu, Z., Zavec, A. B., Borràs, F. E., Buzas, E. I.,  
765 Buzas, K., Casal, E., Cappello, F., Carvalho, J., Colás, E., Cordeiro-da Silva, A., Fais, S.,  
766 Falcon-Perez, J. M., Ghobrial, I. M., Giebel, B., Gimona, M., Graner, M., Gursel, I.,  
767 Gursel, M., ... De Wever, O. Biological properties of extracellular vesicles and their  
768 physiological functions. *JEVs*, 4, 27066 (2015)
- 769 70. Fiebich, B.L., Batista, C.R.A., Saliba, S.W., Yousif, N.M., de Oliveira, A.C.P. Role of  
770 Microglia TLRs in Neurodegeneration. *Front Cell Neurosci*, 12, 329 (2018)
- 771 71. Ciechanover, A., Schwartz, A.L. The ubiquitin-mediated proteolytic pathway:  
772 mechanisms of recognition of the proteolytic substrate and involvement in the degradation  
773 of native cellular proteins. *FASEB J*, 8, 2, 182-91 (1994)
- 774 72. Layfield, R., Cavey, J.R., Lowe, J. Role of ubiquitin-mediated proteolysis in the  
775 pathogenesis of neurodegenerative disorders. *Ageing Res Rev*, 2, 4, 343-56 (2003)
- 776 73. Raiborg, C., Stenmark, H. The ESCRT machinery in endosomal sorting of  
777 ubiquitylated membrane proteins. *Nature*, 458, 7237, 445–452 (2009)
- 778 74. Numakawa, T., Suzuki, S., Kumamaru, E., Adachi, N., Richards, M., Kunugi, H.  
779 BDNF function and intracellular signaling in neurons. *Histol Histopathol*, 25, 2, 237-58  
780 (2010)

- 781 75. Czubowicz, K., Jęsko, H., Wencel, P., Lukiw, W.J., Strosznajder, R.P. The Role of  
782 Ceramide and Sphingosine-1-Phosphate in Alzheimer's Disease and Other  
783 Neurodegenerative Disorders. *Mol Neurobiol*, 56, 8, 5436-5455 (2019)
- 784 76. Kim, J., Inoue, K., Ishii, J., Vanti, W.B., Voronov, S.V., Murchison, E., Hannon, G.,  
785 Abeliovich, A.A. MicroRNA feedback circuit in midbrain dopamine neurons. *Science*, 317,  
786 1220–1224 (2007)
- 787 77. Satoh, J., Kino, Y., Niida, S. MicroRNA-Seq data analysis pipeline to identify blood  
788 biomarkers for Alzheimer's disease from public data. *Biomarker Insights*, 10, 21–31 (2015)
- 789 78. Xu, T., Li, L., Huang, C., Li, X., Peng, Y., Li, J. MicroRNA-323–3p with clinical  
790 potential in rheumatoid arthritis. *Alzheimer's disease and ectopic pregnancy. Expert Opin.*  
791 *Ther Targets*, 18, 2, 153–158 (2014)
- 792 79. Zhao, M., Kim, J. R., van Bruggen, R., & Park, J. RNA-Binding Proteins in  
793 Amyotrophic Lateral Sclerosis. *Molecules and cells*, 41, 9, 818–829 (2018)
- 794 80. Ito, D., Taguchi, R., Deguchi, M., Ogasawara, H., Inoue, E. Extensive splicing changes  
795 in an ALS/FTD transgenic mouse model overexpressing cytoplasmic fused in sarcoma. *Sci*  
796 *Rep.* 10, 1, 4857 (2020)
- 797
- 798
- 799
- 800
- 801
- 802
- 803
- 804
- 805
- 806
- 807
- 808
- 809
- 810
- 811
- 812



813 **Figures**

814

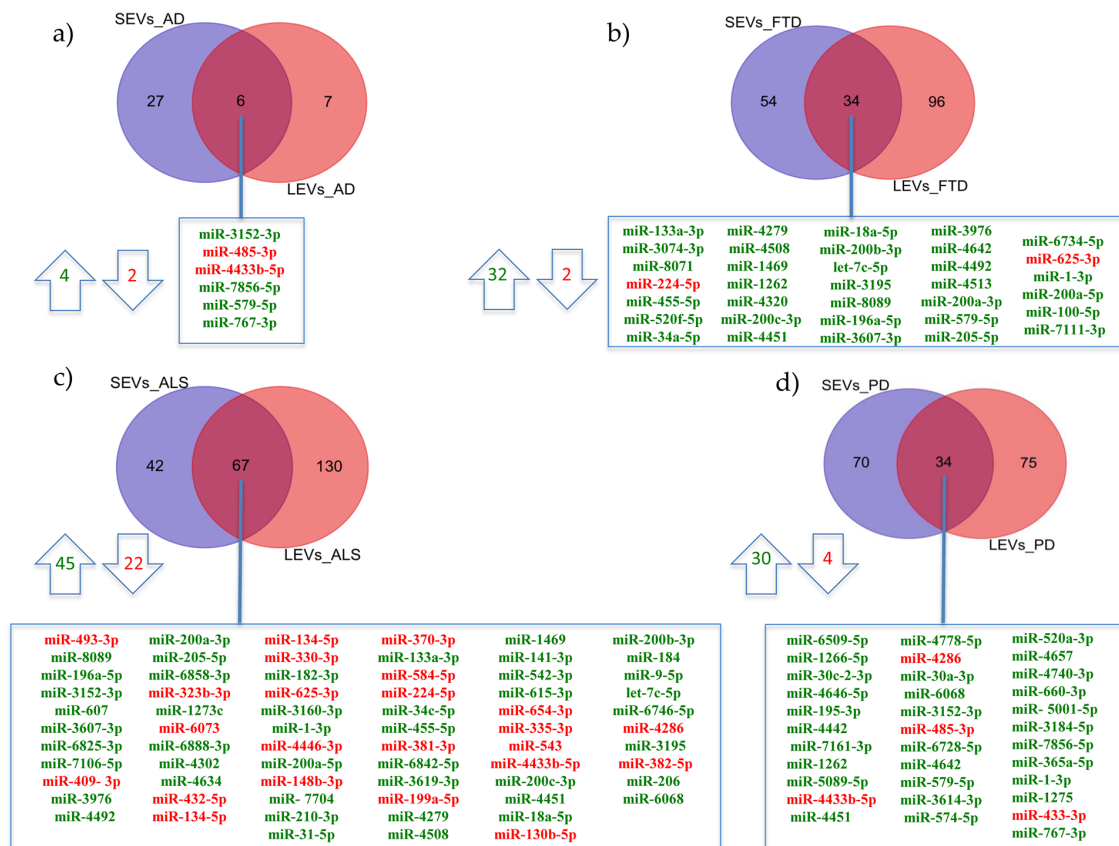

815

816

817

818

819

820

821

822

823

**Figure 1. Common packaging of deregulated miRNAs into SEVs and LEVs of NDs.** (a) In AD, of the 33 miRNAs found in SEVs and 13 in LEVs, 6 distribute to both, 4 upregulated-in green and 2 downregulated-in red; (b) In FTD, of the 88 miRNAs in SEVs and 130 in LEVs, 34 were in common (32 upregulated and 2 downregulated); c) for ALS, of the 109 miRNAs in SEVs and 197 in LEVs, 67 were in common, 45 upregulated and 22 downregulated); d) in PD, of the 104 miRNAs found in SEVs and 109 in LEVs, 34 distribute to both, 30 upregulated and 4 downregulated. Differential miRNA expression analysis by DESeq2 (log2FC > 1, p-value<0.05).

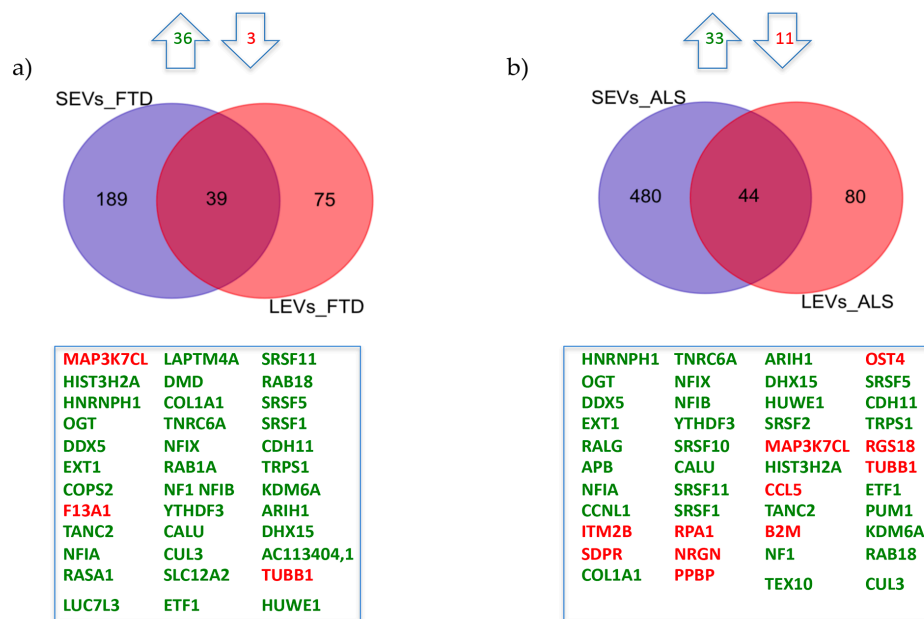

824

825 **Figure 2. Common packaging of deregulated mRNAs into SEVs and LEVs from FTD and ALS patients.** (a) For FTD,  
826 of the 228 mRNA in SEVs and 114 in LEVs, 39 were in common (36 upregulated, green and 3 downregulated, red). (b) For  
827 ALS, of the 522 mRNA in SEVs and 124 in LEVs, 44 were in common (33 upregulated and 11 downregulated). Differential  
828 mRNA expression analysis by DESeq2 ( $\log_2FC > 1$ ,  $p\text{-value} < 0.05$ ).

a) miRNAs SEVs

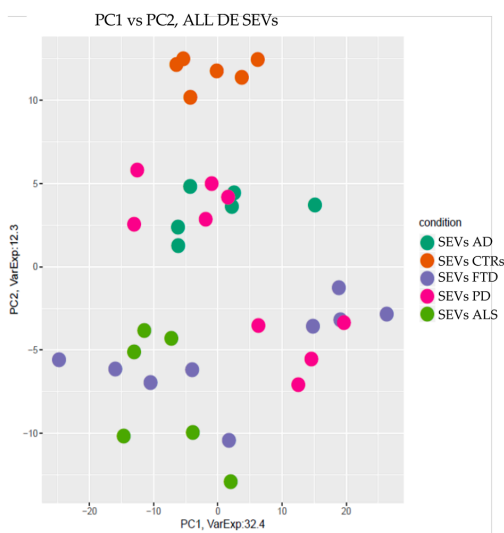

b) miRNAs LEVs

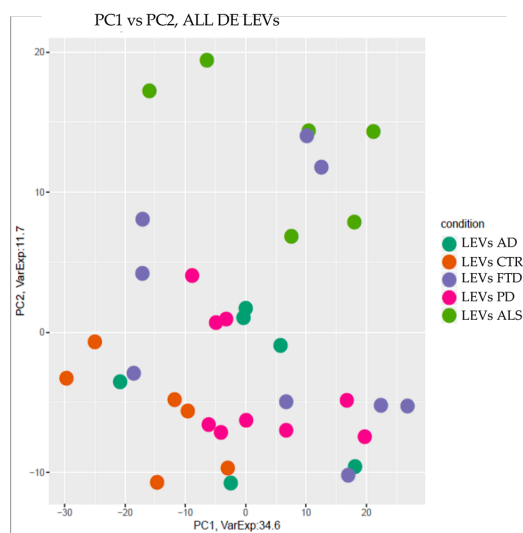

829

830 **Figure 3. PCA of miRNAs differentially expressed in SEVs (a) and LEVs (b) of ALS, FTD, AD and PD patients and**  
831 **healthy controls (CTRs).** PCA is performed using as predictors all the miRNAs identified as differentially expressed in at  
832 least one disease in the comparison of each disease to the control state. Each dot represents a sample and each color  
833 represents a disease.

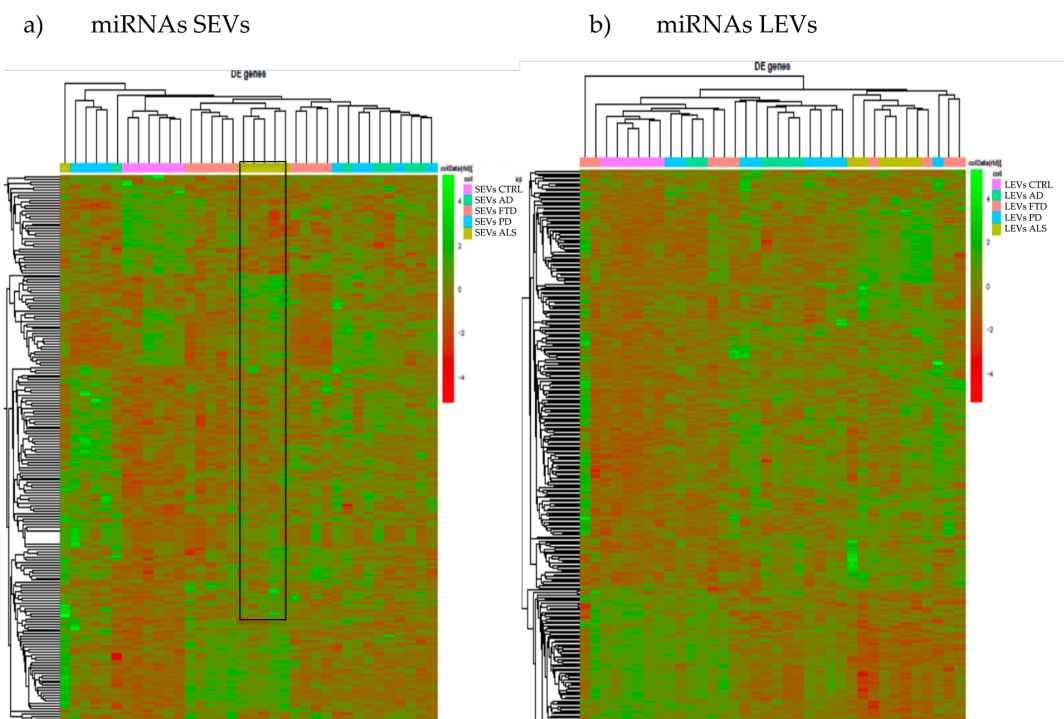

834

835 **Figure 4. Heatmap of log-normalized miRNA expression counts for SEVs (a) and LEVs (b).** All miRNAs identified as  
 836 differentially expressed in at least one disease in the comparison of each disease to the control state were used to build the  
 837 heatmap. Hierarchical clustering was applied to both X and Y axes. The black rectangle in figure a represent a specific  
 838 signature of miRNAs with opposite expression to CTRs.  
 839

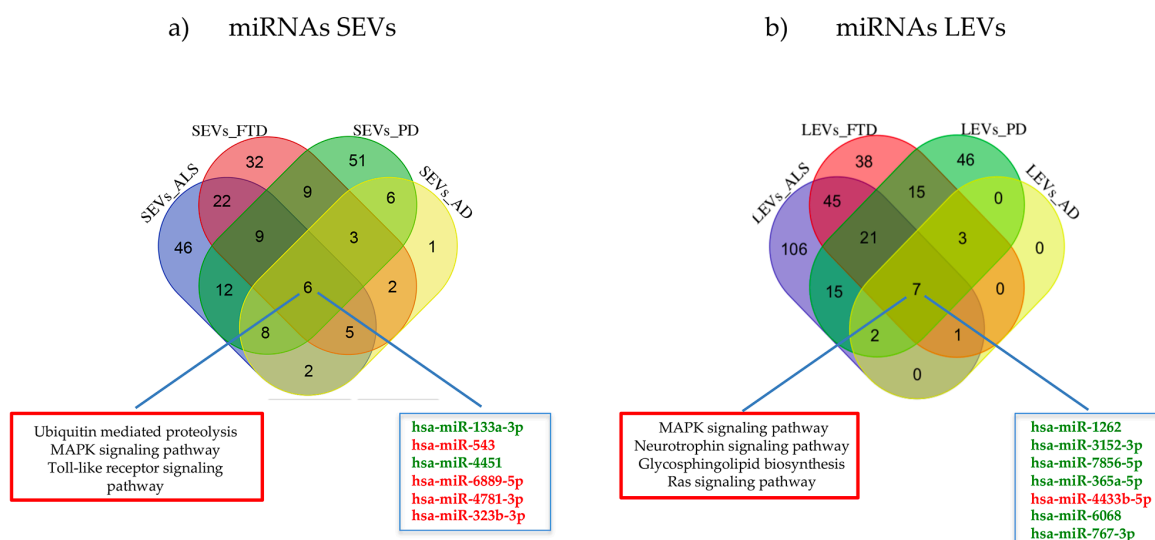

840

841 **Figure 5. Venn diagram showing numbers of common and unique miRNA and RNA in SEVs (A) and LEVs (B) from**  
 842 **plasma of AD, FTD, ALS and PD patients.** Common miRNAs and pathways are listed. Differential mRNA expression  
 843 analysis by edgeR ( $\log_2FC > 1$ ,  $p\text{-value} < 0.05$ ).  
 844

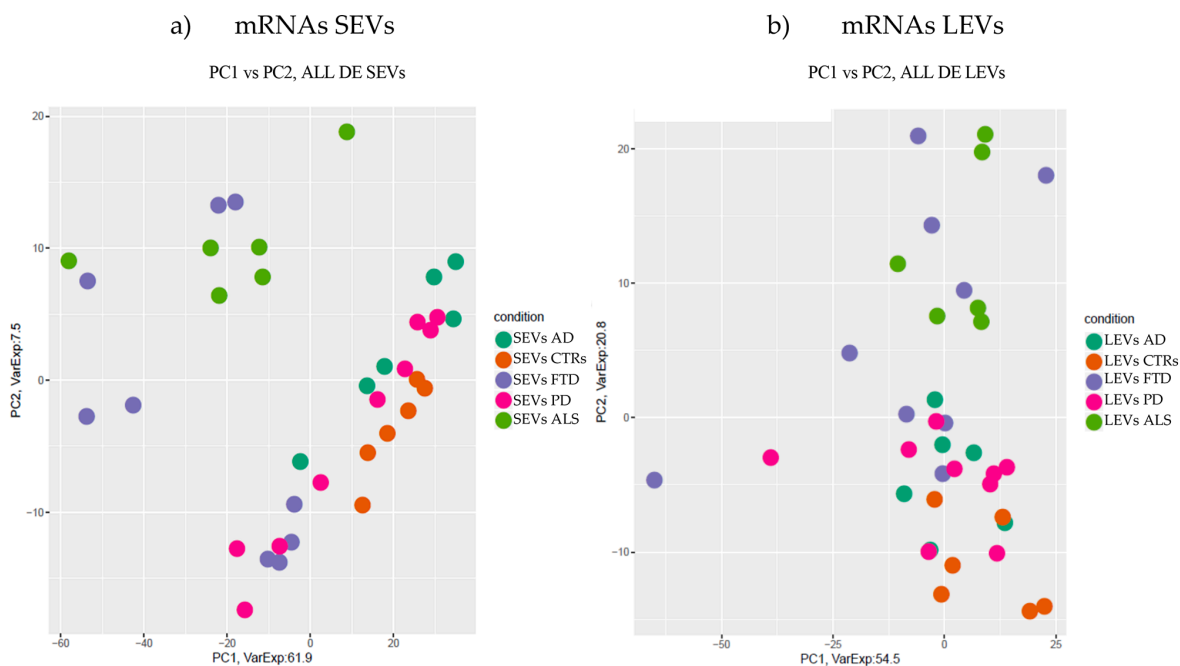

845

846 **Figure 6. PCA of coding genes differentially expressed in SEVs (A) and LEVs (B) of AD, FTD, ALS and PD patients**

847 **and healthy controls (CTRs).** PCA is performed using as predictors all the coding genes identified as differentially

848 expressed in at least one disease in the comparison of each disease to the control state. Each dot represents a sample and

849 each color represents a disease.

850

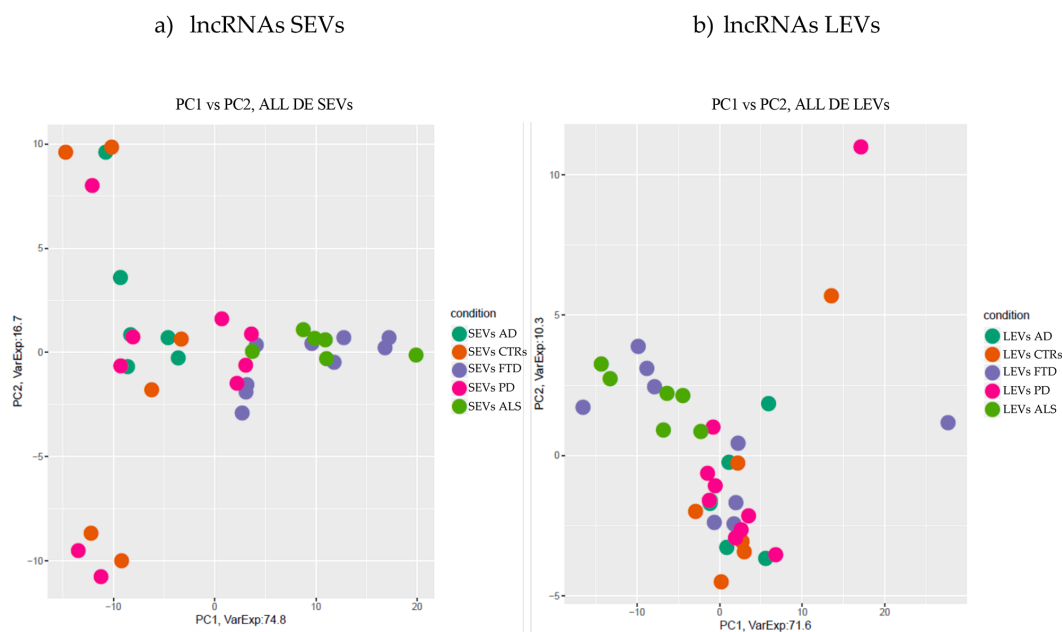

851

852 **Figure 7. PCA of long non coding genes differentially expressed in SEVs (A) and LEVs (B) of AD, FTD, ALS, and**

853 **PD patients and healthy controls (CTRs).** PCA is performed using as predictors all the non-coding genes identified as

854 differentially expressed in at least one disease in the comparison of each disease to the control state. Each dot represents a

855 sample and each color represents a disease

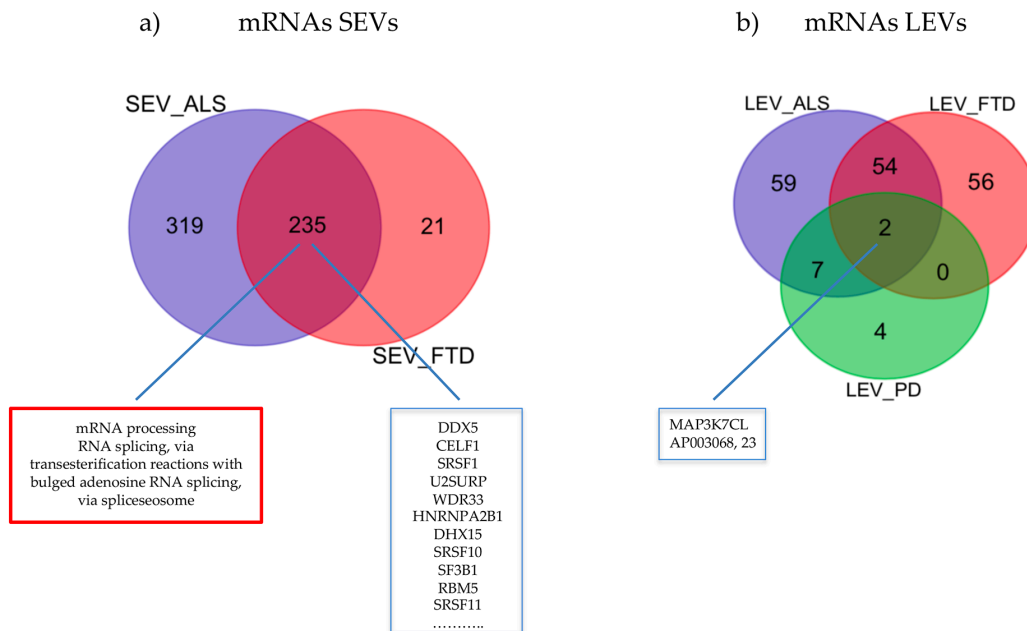

856

857 **Figure 8. Venn diagram showing numbers of common and unique RNA in SEVs from plasma of ALS and FTD**

858 **patients (A) and in LEVs from plasma of ALS, FTD and PD. Common miRNAs and pathways are listed. Differential**

859 **mRNA expression analysis by DESeq2 ( $\log_2FC > 1$ ,  $p\text{-value} < 0.05$ ).**

860

861

862

863

864

865

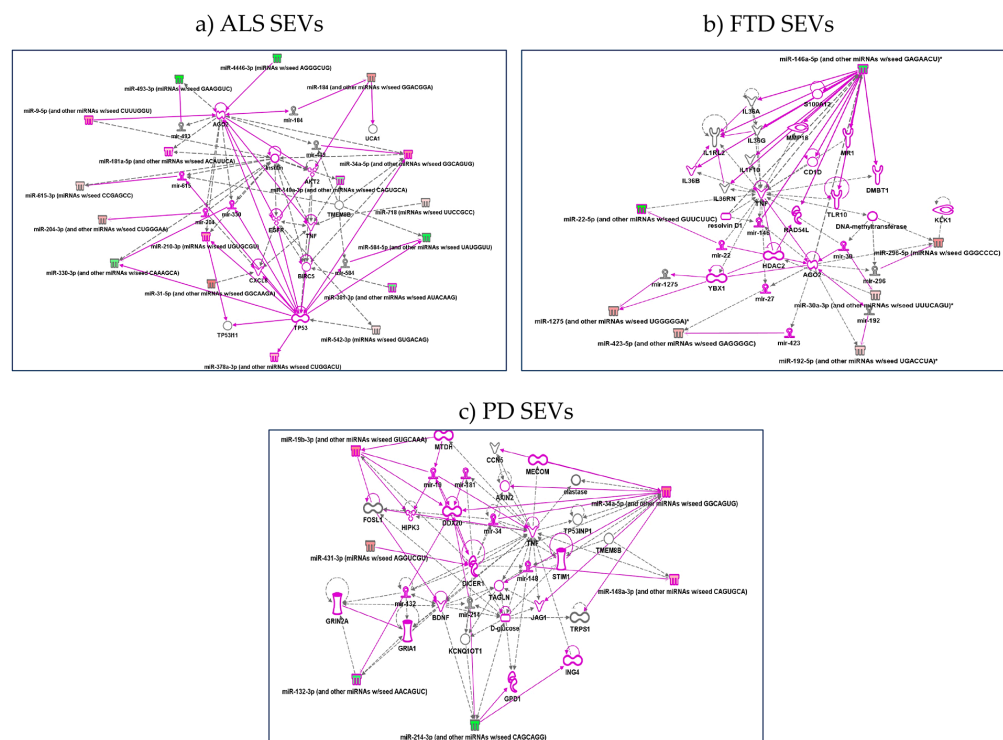

866

867 **Figure 9.** IPA networks among deregulated miRNAs in SEVs from ALS a), FTD (b), PD (c). For ALS miRNAs  
 868 involvement in regulation of DDX58/IFIH1, through miR31-5p and miR615-5p (a); for FTD IL1F10 and TLR10  
 869 regulation by miR146a-5p (B); for PD, regulation of GRIA1, Glutamate receptors, by miR-132-3p, involvement of JAG1  
 870 and TNF regulated by miR-34 (c). Pink color indicates activation while green color indicate suppression. No pathway could  
 871 be calculated for AD disease for the few miRNAs targets.

872

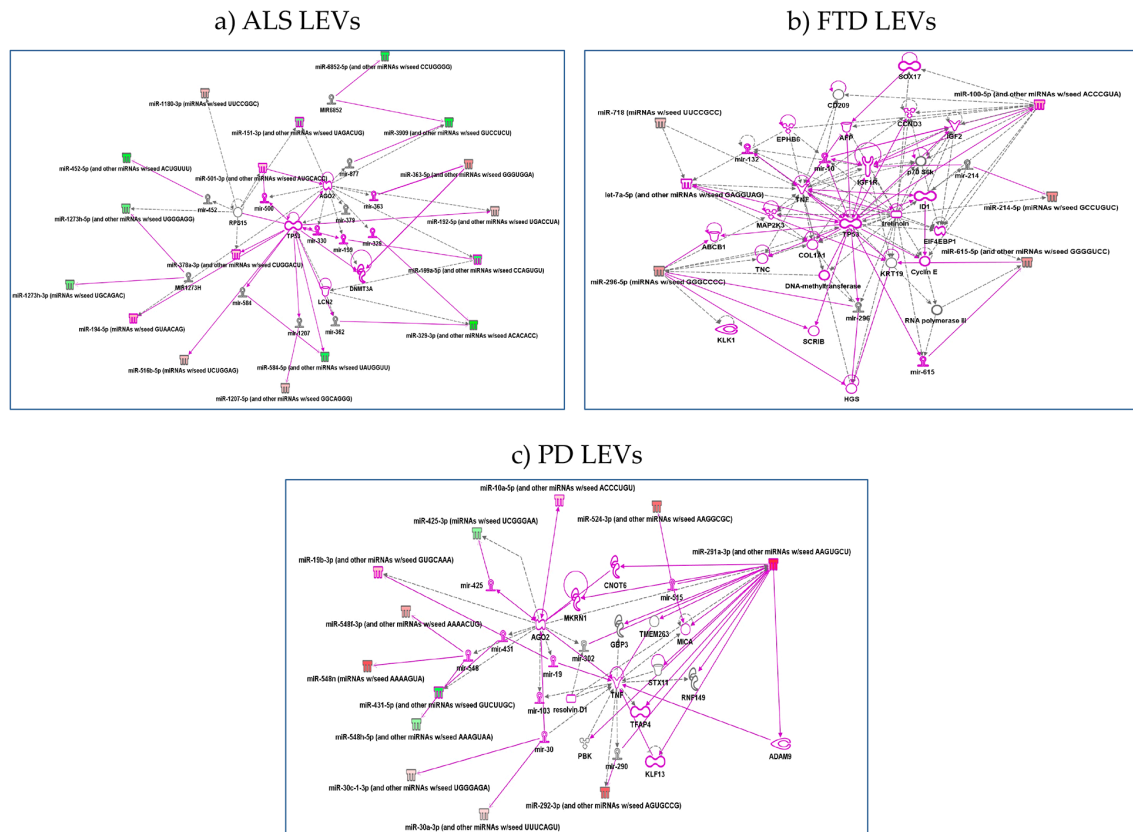

873

874

**Figure 10. IPA networks among deregulated miRNAs in LEVs from ALS (A), FTD (B), PD (C).**a) for ALS regulation of p53 by mir-379, 378, 584-5p, 1207 emerged or hsa-miR-199a-5p and hsa-miR-329a-5p regulate LCN2, lipocalin2); b)

875

for FTD regulation of genes like TP53 by miR-296 and RNA Polymerase II by miR-615 as well as Cyclin E regulated miR-615-5p; c) for LEVs from PD patients regulation of ADAM9 by upregulation of miR-291.

876

Pink color indicates activation while green color indicate suppression.

877

878

879

880

881

882

883

884

885

886

887

888

889

890

891 **Tables.**

892 **Table 1. Baseline characteristics of recruited subjects for this study.** Age is reported as mean  $\pm$  SD. The  
893 percentage of male and female subjects is also indicated.

894

|                                     | <b>CTRs</b>  | <b>AD</b>    | <b>FTD</b>   | <b>ALS</b>   | <b>PD</b>    |
|-------------------------------------|--------------|--------------|--------------|--------------|--------------|
| <b>Recruited subjects</b>           | 6            | 6            | 9            | 6            | 9            |
| <b>Age (mean<math>\pm</math>SD)</b> | 55 $\pm$ 5,2 | 77 $\pm$ 3,7 | 60 $\pm$ 6,7 | 72 $\pm$ 6,3 | 69 $\pm$ 3,6 |
| <b>Males %</b>                      | 43%          | 50%          | 78%          | 50%          | 50%          |
| <b>Females %</b>                    | 67%          | 50%          | 22%          | 50%          | 50%          |

895 CTRs= controls; AD= Alzheimer Disease; FTD= Fronto-Temporal Dementia; ALS= Amyotrophic Lateral  
896 Sclerosis; PD= Parkinson Disease; SD= standard deviation.

897

898

899

900

901

902

903

904

905

906

907

908

909

910

911

912

913

914

915



916 **Table 2. Clinical characteristics of the recruited subjects.**

| <b>Patients</b> | <b>Sex</b> | <b>Age</b> | <b>Education<br/>(years)</b> | <b>Disease<br/>duration<br/>(months)</b> | <b>Familiarity</b> | <b>Onset</b> | <b>Imaging<sup>†</sup></b> | <b>MMSE<sup>††</sup></b> | <b>CDR<sup>†††</sup></b> |
|-----------------|------------|------------|------------------------------|------------------------------------------|--------------------|--------------|----------------------------|--------------------------|--------------------------|
| AD1             | M          | 78         | 5                            | 50                                       | No                 | Amnesic      | 1.3                        | 15                       | 2                        |
| AD2             | M          | 70         | 8                            | 48                                       | Yes                | Amnesic      | 1                          | 19                       | 1.5                      |
| AD3             | F          | 79         | 5                            | 48                                       | No                 | Amnesic      | 2                          | 20                       | 1                        |
| AD4             | M          | 77         | 5                            | 40                                       | No                 | Amnesic      | 1                          | 13                       | 2                        |
| AD5             | F          | 82         | 5                            | 38                                       | Yes                | Amnesic      | 1                          | 18                       | 1                        |
| AD6             | F          | 76         | 5                            | 42                                       | Yes                | Amnesic      | 2.3                        | 17                       | 2                        |

917 AD= Alzheimer Disease; MMSE= Mini Mental State Examination; CDR= Clinical Dementia Rating; M= male;

918 F= female.

919 <sup>†</sup>Imaging: 1 temporal atrophy; 2 diffuse atrophy; 3 vascular suffering

920 <sup>††</sup>MMSE: normal values >24-30

921 <sup>†††</sup>CDR: 1 mild; 2 moderate; 3 severe

922

| <b>Patients</b> | <b>Sex</b> | <b>Age</b> | <b>Education<br/>(years)</b> | <b>Disease<br/>duration<br/>(months)</b> | <b>Familiarity</b> | <b>cMMSE<sup>†</sup></b> | <b>Tau<sup>††</sup></b> | <b>pTau<sup>†††</sup></b> | <b>A<math>\beta</math><sup>††††</sup><br/>1-42</b> |
|-----------------|------------|------------|------------------------------|------------------------------------------|--------------------|--------------------------|-------------------------|---------------------------|----------------------------------------------------|
| FTD1            | M          | 54         | 8                            | 24                                       | No                 | 8,97                     | <10                     | 10                        | 683                                                |
| FTD2            | F          | 57         | 8                            | 36                                       | No                 | 15,74                    | 419                     | 43                        | 616                                                |
| FTD3            | M          | 70         | 8                            | 36                                       | No                 | 18                       | NA                      | NA                        | NA                                                 |
| FTD4            | M          | 62         | 8                            | 34                                       | No                 | 17                       | 164                     | 42                        | 1312                                               |
| FTD5            | M          | 52         | 8                            | 34                                       | No                 | 17,97                    | 195                     | 42                        | 1378                                               |
| FTD6            | M          | 69         | 11                           | 36                                       | No                 | 21                       | NA                      | NA                        | NA                                                 |
| FTD7            | M          | 56         | 13                           | 60                                       | No                 | 17,99                    | <10                     | 7                         | 360                                                |
| FTD8            | M          | 49         | 5                            | 12                                       | No                 | 18,31                    | 799                     | 68                        | 1780                                               |
| FTD9            | F          | 75         | 8                            | 44                                       | No                 | 17                       | NA                      | NA                        | NA                                                 |

923 FTD= Fronto-Temporal Dementia; cMMSE= correct Mini Mental State Examination, i.e. the MMSE corrected

924 for education; A $\beta$ = Amyloid beta; NA= not available; M= male; F= female.

925 <sup>†</sup>cMMSE= normal values >24-30

926 <sup>††</sup>Tau= normal values <375 pg/ml

927 <sup>†††</sup>pTau= normal values <52 pg/ml

928 <sup>††††</sup>A $\beta$  1-42= normal values >550 pg/ml

929

930

931

932

933

934

935

936

| <b>Patients</b> | <b>Sex</b> | <b>Age</b> | <b>Education<br/>(years)</b> | <b>Disease<br/>duration<br/>(months)</b> | <b>Familiarity</b> | <b>Site of<br/>Onset</b> | <b>ALSFRS<sup>†</sup></b> | <b>Therapy<br/>(Riluzole)</b> |
|-----------------|------------|------------|------------------------------|------------------------------------------|--------------------|--------------------------|---------------------------|-------------------------------|
| ALS1            | F          | 69         | 13                           | 19                                       | No                 | Spinal                   | 9                         |                               |
| ALS2            | F          | 70         | NA                           | 52                                       | No                 | Spinal                   | 29                        | 19                            |
| ALS3            | F          | 69         | NA                           | 11                                       | No                 | Spinal                   | 34                        | 20                            |
| ALS4            | M          | 71         | 5                            | 24                                       | No                 | Spinal                   | 46                        | 13                            |
| ALS5            | M          | 72         | 13                           | 67                                       | No                 | Spinal                   | 28                        | 18                            |
| ALS6            | M          | 67         | 5                            | 28                                       | No                 | Spinal                   | 40                        | 17                            |

937 ALS= Amyotrophic Lateral Sclerosis; ALSFRS= ALS Functional Rating Scale; NA= not available; M= male;  
938 F= female.

939 <sup>†</sup>ALSFRS: minimum score: 0; maximum score: 40. The higher the score the more function is retained.

940

941

| <b>Patients</b> | <b>Sex</b> | <b>Age</b> | <b>Education<br/>(years)</b> | <b>Disease<br/>duration<br/>(years)</b> | <b>Familiarity</b> | <b>Affected<br/>side</b> | <b>UPDRS<br/>III<sup>†</sup></b> | <b>Therapy<br/>LEDD<sup>††</sup></b> | <b>Disorders<br/>of<br/>behaviour</b> |
|-----------------|------------|------------|------------------------------|-----------------------------------------|--------------------|--------------------------|----------------------------------|--------------------------------------|---------------------------------------|
| PD1             | F          | 70         | NA                           | 8                                       | No                 | Right                    | 12                               | 350                                  | No                                    |
| PD2             | M          | 73         | NA                           | 7                                       | Yes                | Right                    | 10                               | 320                                  | ICD                                   |
| PD3             | M          | 68         | 8                            | 19                                      | No                 | Left                     | 44                               | 800                                  | ICD                                   |
| PD4             | M          | 69         | NA                           | 13                                      | Yes                | Right                    | 18                               | 500                                  | No                                    |
| PD5             | F          | 73         | 8                            | 10                                      | Yes                | Right                    | 17                               | 1000                                 | No                                    |
| PD6             | M          | 76         | NA                           | 7                                       | No                 | Right                    | 18                               | 650                                  | No                                    |
| PD7             | F          | 68         | NA                           | 6                                       | No                 | Right                    | 20                               | 600                                  | No                                    |
| PD8             | M          | 76         | 8                            | 13                                      | Yes                | Left                     | 35                               | 690                                  | No                                    |
| PD9             | F          | 73         | NA                           | 13                                      | Yes                | Left                     | 15                               | 350                                  | ICD                                   |

942 PD= Parkinson Disease; <sup>†</sup>UPDRS III= Unified Parkinson's Disease Rating Scale-motor part. Patients where  
943 tested during the ON phase; <sup>††</sup>Therapy LEDD: levodopa equivalent daily dose (LEDD), mg/day; NA= not  
944 available; ICD= Impulse Control Disorders.

945

946

947

948

949

950

951

952

953 **Table 3. Statistically significant number of differentially expressed miRNAs in SEVs and LEVs from**  
 954 **ALS, FTD, AD, PD patients.** Up-regulated transcripts, down-regulated transcripts and total compared to CTRs  
 955 were reported. Transcripts were considered as differentially expressed when  $|\log_2(\text{disease sample/healthy}$   
 956  $\text{controls})| \geq 1$  and a  $\text{FDR} \leq 0.1$ .

|                             | AD          |             | FTD         |             | ALS         |             | PD          |             |
|-----------------------------|-------------|-------------|-------------|-------------|-------------|-------------|-------------|-------------|
|                             | <i>SEVs</i> | <i>LEVs</i> | <i>SEVs</i> | <i>LEVs</i> | <i>SEVs</i> | <i>LEVs</i> | <i>SEVs</i> | <i>LEVs</i> |
| <b>miRNA up-regulated</b>   | 17          | 10          | 49          | 113         | 80          | 128         | 85          | 87          |
| <b>miRNA down-regulated</b> | 16          | 3           | 39          | 17          | 29          | 69          | 19          | 22          |
| <b>Total</b>                | 33          | 13          | 88          | 130         | 109         | 197         | 104         | 109         |

957 AD= Alzheimer Disease; FTD= Fronto-Temporal Dementia; ALS= Amyotrophic Lateral Sclerosis; PD=  
 958 Parkinson Disease; CTRs= controls; SEVs= small extracellular vesicles; LEVs= large extracellular vesicles;  
 959 miRNA= microRNA; FDR= False Discovery Rate.

960  
 961  
 962  
 963  
 964  
 965  
 966  
 967  
 968  
 969  
 970  
 971  
 972  
 973  
 974  
 975  
 976  
 977  
 978  
 979  
 980

981 **Table 4. Number of statistically significant differentially expressed RNAs in SEVs and LEVs from AD,**  
 982 **FTD, ALS and PD patients in terms of up-regulated transcripts, down-regulated transcripts and total**  
 983 **compared to CTRs.** Transcripts were considered as differentially expressed when  $|\log_2(\text{disease sample/healthy}$   
 984  $\text{control})| \geq 1$  and a  $\text{FDR} \leq 0.1$ .  
 985

|                                      | <b>AD</b>   |             | <b>FTD</b>  |             | <b>ALS</b>  |             | <b>PD</b>   |             |
|--------------------------------------|-------------|-------------|-------------|-------------|-------------|-------------|-------------|-------------|
| <i>WHOLE</i><br><i>TRANSCRIPTOME</i> | <i>SEVs</i> | <i>LEVs</i> | <i>SEVs</i> | <i>LEVs</i> | <i>SEVs</i> | <i>LEVs</i> | <i>SEVs</i> | <i>LEVs</i> |
| <b>mRNA up-regulated</b>             | 0           | 0           | 194         | 64          | 499         | 32          | 0           | 2           |
| <b>mRNA down-regulated</b>           | 0           | 0           | 33          | 23          | 43          | 56          | 0           | 10          |
| <b>Total</b>                         | 0           | 0           | 227         | 87          | 542         | 88          | 0           | 12          |
| <b>lncRNA up-regulated</b>           | 0           | 0           | 15          | 17          | 16          | 14          | 0           | 0           |
| <b>lncRNA down-regulated</b>         | 0           | 0           | 0           | 2           | 0           | 4           | 0           | 1           |
| <b>Total</b>                         | 0           | 0           | 15          | 19          | 16          | 18          | 0           | 1           |

986 AD= Alzheimer Disease; FTD= Fronto-Temporal Dementia; ALS= Amyotrophic Lateral Sclerosis; PD=  
 987 Parkinson Disease; CTRs= controls; SEVs= small extracellular vesicles; LEVs= large extracellular vesicles;  
 988 lncRNAs= long non coding RNAs, FDR= False Discovery Rate.  
 989  
 990  
 991  
 992  
 993  
 994  
 995  
 996  
 997  
 998  
 999

1000

1001 **Table 5. Percentage of common miRNAs and mRNAs in SEVs and LEVs in AD, FTD, ALS and PD.**

| <b>miRNA</b>                       |             |             |
|------------------------------------|-------------|-------------|
| Common miRNAs in SEVs and LEVs (%) |             |             |
|                                    | <i>SEVs</i> | <i>LEVs</i> |
| <b>AD</b>                          | 18.2        | 46.2        |
| <b>FTD</b>                         | 38.6        | 25.2        |
| <b>ALS</b>                         | 61.5        | 34          |
| <b>PD</b>                          | 32.7        | 31.2        |

  

| <b>mRNA</b>                       |             |             |
|-----------------------------------|-------------|-------------|
| Common mRNAs in SEVs and LEVs (%) |             |             |
|                                   | <i>SEVs</i> | <i>LEVs</i> |
| <b>AD</b>                         | 0           | 0           |
| <b>FTD</b>                        | 17.1        | 34.2        |
| <b>ALS</b>                        | 8.4         | 35.5        |
| <b>PD</b>                         | 0           | 0           |

1002 AD= Alzheimer Disease; FTD= Fronto-Temporal Dementia; ALS= Amyotrophic Lateral Sclerosis; PD=  
1003 Parkinson Disease; CTRs= controls; SEVs= small extracellular vesicles; LEVs= large extracellular vesicles;  
1004 miRNAs= micro RNAs.

1005

1006

1007

1008

1009

1010

1011

1012

1013

1014

1015

1016

1017

1018

1019

1020

1021 **Additional files**

1022

1023 **Figure S1: LEVs and SEVs characterization.** a) Nanosight profile of LEVs and SEVs from plasma of a CTR, AD, PD,  
1024 ALS, FTD patients; b and c) Representative images obtained by transmission electron microscopy (TEM) of LEVs and  
1025 SEVs from plasma (Scale bar: 100 nm, 50 nm). d) Western Blot of LEVs and SEVs markers in LEVs and SEVs samples  
1026 from one CTR, an ALS, AD, PD, FTD patients showed the presence of Annexin V only in LEVs pellet and Alix in SEVs  
1027 fraction.

1028

1029 **Table S1. Differentially expressed miRNAs in ALS, FTD, PD and AD groups respect to healthy controls.** miRNA  
1030 ID, measured log2FC and p-value are reported for each transcript.

1031

1032 **Table S2. Differentially expressed RNAs in ALS, FTD, PD and AD groups respect to healthy controls.** Transcript  
1033 ID, gene name, gene type, gene status, measured log2FC and false discovery rate (FDR) are reported for each transcript.  
Only transcripts with  $|\log_2(\text{disease sample/healthy control})| \geq 1$  and a  $\text{FDR} \leq 0.1$  are shown.

1034

1035 **Table S3. miRWalk specific miRNAs pathways in ALS, FTD, PD and AD groups.** Deregulated miRNAs specific of  
1036 each disease were analysed with miRWalk web tool. Reactome Analysis and Gene Ontology Biological Processes with a  
p value < 0.05 are listed.

1037

1038 **Table S4. miRWalk specific miRNAs pathways divided in up and down-regulated miRNAs in ALS, FTD, PD and**  
1039 **AD groups.** Deregulated miRNAs specific of each disease were analysed with miRWalk web tool. Reactome Analysis  
and Gene Ontology Biological Processes with a p value < 0.05 are listed.

1040

1041 **Table S5. mRNAs pathways in ALS, FTD, PD and AD groups.** EnrichR web tool was used to calculate enriched  
pathways. KEGG and Gene Ontology Biological Processes with a p value < 0.05 are listed

1042

1043 **Table S6. Specific mRNAs pathways in ALS, FTD, PD and AD groups.** Deregulated mRNAs specific of each disease  
were analysed with EnrichR web tool. KEGG and Gene Ontology Biological Processes with a p value < 0.05 are listed

1044

1045

1046

1047

1048
